# Supplementary material for: Lung epithelial and endothelial damage, loss of tissue repair, inhibition of fibrinolysis, and cellular senescence in fatal COVID-19
Source: PubMed Central journal article supplement (PMC11000440; doi:10.1126/scitranslmed.abj7790), 2021-11-17
Supplement: NIHMS1982184-supplement-suppl_figures.pdf [file NIHMS1982184-supplement-suppl_figures.pdf]

Supplementary Materials for  
**Lung epithelial and endothelial damage, loss of tissue repair, inhibition of  
fibrinolysis, and cellular senescence in fatal COVID-19**

Felice D'Agnillo *et al.*

Corresponding author: Jeffery K. Taubenberger, [taubenbergerj@niaid.nih.gov](mailto:taubenbergerj@niaid.nih.gov)

*Sci. Transl. Med.* **13**, eabj7790 (2021)  
DOI: 10.1126/scitranslmed.abj7790

**The PDF file includes:**

Materials and Methods  
Figs. S1 to S23  
Tables S1 to S12  
References (95–102)

**Other Supplementary Material for this manuscript includes the following:**

Data file S1

## **MATERIALS AND METHODS**

### **Immunohistochemistry and immunofluorescence protocols**

FFPE lung sections were dewaxed, rehydrated, and heat-treated in a microwave oven for 15 minutes in 10 mM sodium citrate buffer (pH 6.0) or 10 mM Tris/1 mM EDTA buffer (pH 9.0). After cooling for 30 min at room temperature (RT), slides were washed in phosphate-buffered saline with 0.05% Tween-20 (PBST) and incubated with Bloxall (Vector Laboratories, Burlingame, CA) for 15 min at RT to inhibit endogenous peroxidases. After a brief wash, sections were blocked in 2.5% horse serum for 30 min at RT and incubated overnight at 4°C with primary antibodies in PBST containing 2.5% horse serum (table S12). For negative controls, sections were incubated without the primary antibody or mouse and rabbit isotype antibody controls. Signal was developed using polymeric peroxidase-conjugated secondary antibodies (Vector ImmPRESS Kit) and ImmPACT DAB (Vector Laboratories). Slides were washed, dehydrated in graded ethanol and SafeClear II (xylene substitute), and mounted using Permount (ThermoFisher, Waltham, MA). Images were captured using an Olympus IX71 inverted microscope fitted with Plan Apochromat 40x and 60x objectives and an Olympus DP80 digital camera and processed using cellSens imaging software. For immunofluorescence analyses, heat-retrieved sections were blocked in PBST with 2.5% bovine serum albumin (BSA) for 30 min at RT followed by overnight incubation at 4°C with primary antibodies in 1% BSA. Sections were rinsed and incubated with Alexa Fluor 488 and Alexa Fluor 647-conjugated secondary antibodies for 1 hour at RT (ThermoFisher, Waltham, MA). Nuclei were counterstained with Hoechst 33342. For double labeling experiments, primary antibodies were mixed and incubated overnight at 4°C. Sections stained with secondary antibodies alone showed no specific staining. Images were captured using an Axio Observer Z1 inverted microscope (Carl Zeiss, Thornwood, NY) equipped with an Axiocam 506 monochrome

camera, an ApoTome.2 optical sectioning system, and a Plan-Apochromat 63x/1.4NA oil immersion with WD=0.19 and Plan-Apochromat 20x/0.8 objective lens. Digital image post-processing and analysis were performed using the ZEN 2 ver. 2.0 imaging software. Images were constructed from Z-stack slices collected at 0.6  $\mu\text{m}$  intervals (6  $\mu\text{m}$  thickness in total) and visualized as maximum intensity projections in orthogonal mode. Whole slide brightfield and fluorescence imaging was also performed using a Hamamatsu NanoZoomer 2.0-RS whole-slide digital scanner with a fluorescence module #L11600 and NDP.view2 software was used for processing (Hamamatsu Photonics, Japan).

### **DAD histopathology image analysis**

H&E-stained lung sections from COVID-19 patients were scored for DAD histopathology by two qualified and blinded investigators (FD, JKT). Histological criteria were defined for DAD stages including acute (hyaline membranes, interstitial or alveolar edema, epithelial sloughing, alveolar/interstitial inflammation); organizing (epithelial hyperplasia, loose organizing fibrosis); and fibrotic (dense interstitial fibrosis, epithelial metaplasia/bronchiolization). Histological grading of severity or prevalence for these histological criteria was scored on a scale of 0 – 3 (0 – absent or minimal, 1 – mild, 2 – moderate, 3 – severe). High resolution whole-slide digital images of each lung section were divided into four quadrants and each quadrant was assigned a score for acute, organizing, and fibrotic DAD. The individual quadrant scores (n = 8 scores per DAD stage) were averaged and a final score for each DAD stage was derived for each lung section.

### **Immunofluorescence image analyses**

Semiquantitative and blinded evaluation of pulmonary neutrophils was performed on sections stained by MPO immunofluorescence. A total of 20-25 randomly selected fields from high resolution whole-slide digitized images of MPO-stained lung sections were examined at 400x magnification. For each field, the number of MPO-positive cells were counted, averaged, and a final count per high power field (HPF) was derived for each lung section. Nucleated MPO-stained cells were counted as positive regardless of staining intensity or morphology, and stained cells in large or medium-sized vessels were excluded.

Semiquantitative analysis of Pro-SPC immunofluorescence was performed in lung sections from non-COVID-19 patients (n = 5) and a subset of COVID-19 cases with predominant acute DAD histopathology (n = 4). Pro-SPC stained sections were examined at 400x magnification and a total of 15 high resolution fields were captured. For each field, nucleated cells with detectable Pro-SPC reactivity localized to alveolar septa were counted, averaged, and a final count per HPF was derived for each lung section. Cases with predominant organizing and fibrotic DAD were not evaluated as alveolar septa were not easily distinguishable and aberrant Pro-SPC expression in hyperplastic and metaplastic epithelial lesions precluded reliable analysis.

Semiquantitative analysis of CD163 immunofluorescence was performed in lung sections from non-COVID-19 patients (n = 3) and COVID-19 cases with acute (n = 5) and fibrotic DAD (n = 4) as determined by histological grading. A total of 15 randomly selected fields were acquired at 200x magnification using the Zeiss ApoTome.2 system, and 16-bit image files were processed using the Fiji/ImageJ software version 1.53c (NIH, Bethesda, MD; <http://imagej.nih.gov/ij>). Threshold limits were normalized across all analyses, and fluorescence integrated density measurements were

recorded and averaged for each case. Final values were reported as the means  $\pm$  SD for each analysis group.

Semiquantitative evaluation of VWF immunofluorescence was performed on lung sections from non-COVID-19 patients (n = 5) and COVID-19 cases (n = 17). High resolution whole-slide digital images of each lung section were divided into four quadrants. Each quadrant was assigned a score for VWF staining based on the following scale (0 – 3): 0 – absent or minimal staining, 1 – detectable vessel and capillary staining, 2 – increased vessel lumen-associated VWF expression with detectable extravascular VWF staining affecting < 50% of the field, 3 – increased vessel lumen-associated VWF expression with detectable extravascular VWF staining affecting > 50% of the field. The individual quadrant scores were averaged to generate a final VWF score for each lung section.

### **Protein structure**

The crystal structures of SARS-CoV-2 RBD in complex with neutralizing antibody H014 (7CAH) and CC12.1 (6XC2) were downloaded from the Research Collaboratory for Structural Bioinformatics (RCSB) Protein Data Bank (PDB) (<http://www.rcsb.org/pdb/home/home.do>) (95), and amino acid changes in RBD were made and viewed with Swiss-PdbViewer (96).

**Library construction and sequencing.** Three normal lung total RNA samples were purchased from BioChain Institute, Inc (Newark, CA), Thermo Fisher Scientific Inc. (Waltham, MA), and Takara Bio Inc. (Kusatsu, Shiga, Japan), respectively. First, isolated total RNA from FFPE samples and purchased normal lung total RNA were performed rRNA depletion by using NEBNext®

rRNA Depletion Kit (New England Biolabs, Ipswich, MA). Seven  $\mu$ l of rRNA depleted RNA was used to construct total RNA library and was performed according to TruSeq RNA Library Prep Kit v2 (Illumina, San Diego, CA, USA) eliminating the poly-A selection and RNA fragmentation steps (library construction from normal lung RNA only eliminated poly-A selection step). For SARS-CoV-2 enriched library, isolated total RNA from FFPE sample was amplified using the Ovation RNA-Seq system V2 from NuGEN (NuGEN, San Carlos, CA). For each sample, 5 $\mu$ l of total RNA was used as input. The amplified total cDNAs were analyzed by an Agilent 2100 Bioanalyzer using the Agilent High Sensitivity DNA Kit (Agilent Technologies, Santa Clara, CA) and sheared to 150bp on the Covaris S2 machine (Covaris, Woburn, MA). The Agilent 2100 Bioanalyzer was then used to analyze amplified sheared cDNA using the Agilent High Sensitivity DNA Kit (Agilent Technologies, Santa Clara, CA) again. Approximately 300ng of amplified cDNA was used to generate the Illumina sequencing library using the Agilent SureSelect<sup>XT</sup> Target Enrichment Kit (Agilent, Santa Clara, CA) enriched with SureSelect Community Design Pan Human Coronavirus Panel for Illumina Multiplex Sequencing. Final Illumina sequencing libraries were analyzed with the Agilent 2100 Bioanalyzer using the Agilent High Sensitivity DNA Kit. Libraries were then pooled and sequenced on an Illumina NextSeq sequencer (Illumina, San Diego, CA). In this project, more than 3.4 billion reads were generated. All sequences generated were deposited as a series into the GenBank SRA database.

**Data analysis.** Reads were mapped to the Bowtie2 (101) (version 2.3.4.1, <http://bowtie-bio.sourceforge.net/bowtie2/index.shtml>) indexed *H. sapiens*, GRCh38 downloaded from the Center for Computational Biology, Johns Hopkins University (<http://ccb.jhu.edu/>) or Hisat2 (97) indexed SARS-CoV-2/human/USA/NY-PV08472/2020 genome (GenBank: MT370889.1) using

Bowtie2 or Hisat2. SAMtools mpileup (version 2.1.0) (100) was used to generate mpileup files that were subsequently used to make SNP calls by VarScan2 (98, 99). Bacteria classification in all the samples was done by running Kraken2 (102) on the reads that failed to be mapped to the human genome. A reported SNP call was the one that satisfied the following criteria at the SNP position: 1) more than 100 reads at that position, 2) minimum base Phred quality score as 25, 3) the different bases were more than 10% of the aligned reads, 4) pass VarScan2 Strand Filter, 5) VarScan2 SNP call p-value less than 0.05. Consensus nucleotide sequence was generated by VarScan2 with default setting. The amino acid replacements in SARS-CoV-2 genomes were downloaded on Nov 19, 2020 from CoV-GLUE site that tracks the mutations from sequenced SARS-CoV-2 genomes (<http://cov-glue.cvr.gla.ac.uk/#/home>), which was compared to the called SNPs in our study.

### **Strain selection to place autopsy samples into local/global context**

Nextstrain<sup>1</sup> SARS-CoV-2 North America, which is a sample of all strains isolated in North America, aimed at covering the genetic diversity of SARS-CoV-2 circulating up to November 2020 (<https://nextstrain.org/ncov/north-america>) was used for local context. Sequences of all New York State (NY) and Californian (CA) isolates were downloaded from GISAID<sup>2</sup>. Ten isolates each from NY and CA were randomly selected. For the global context, the Nextstrain SARS-CoV-2 Global build (<https://nextstrain.org/ncov/global>) was used, which is a sample of all strains isolated up to November 2020. Next, we down sampled the dataset to 25 strains using Treemmer<sup>2</sup> and subsequently downloaded the sequences from GISAID<sup>2</sup>.

### **Alignment, phylogenetic inference and visualization**

Autopsy samples that passed the Nextclade (<https://clades.nextstrain.org/> v.0.8.1) quality filtering thresholds were included. The autopsy sequences were aligned and the local/global diversity set to the reference genome (NC\_045512.2) with mafft (v.7.467). The phylogeny was inferred using IQtree (v.1.6.12) with the best-fitting substitution model (GTR+F+I+G4) and 1000 rapid bootstrap replicates. The phylogeny was plotted using the package ggtree (v.2.0.4)<sup>3</sup> for R (v. 3.6.2).



SUPPLEMENTARY FIGURES

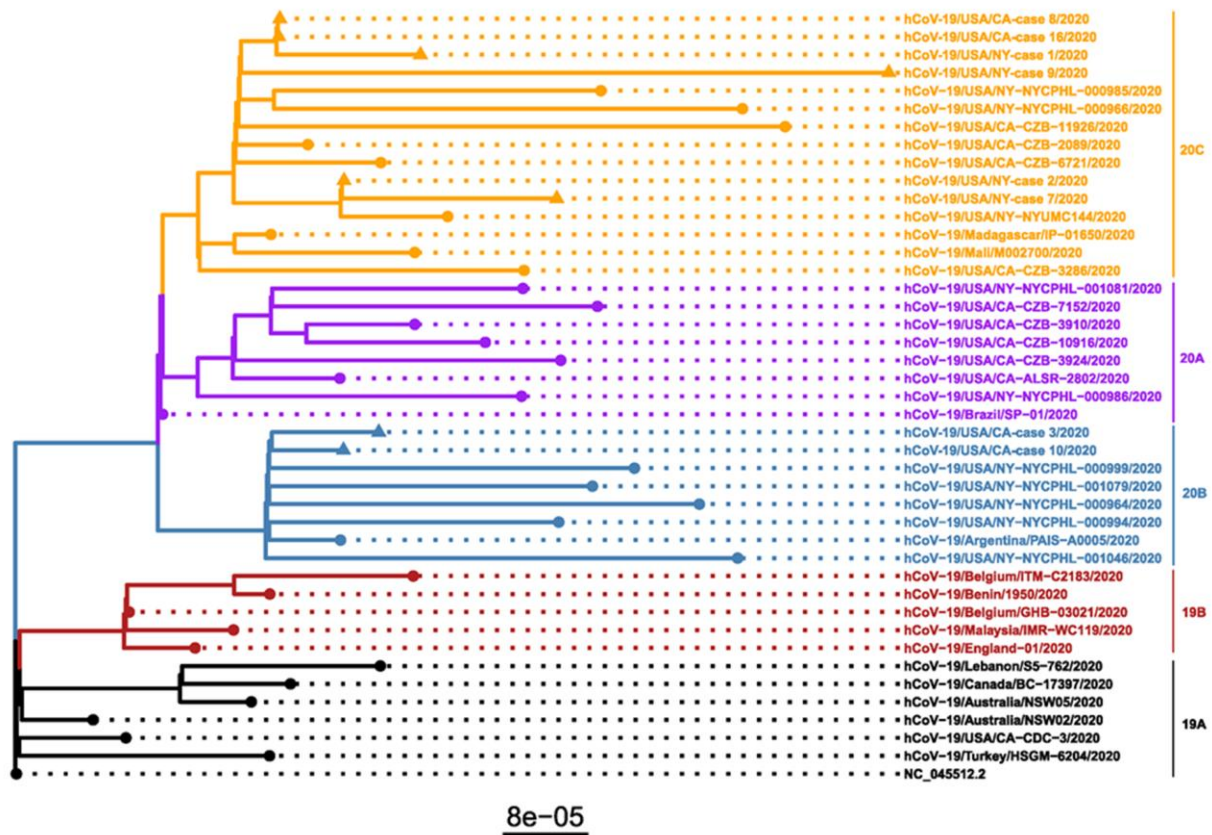

**Fig. S1. SARS-CoV-2 phylogeny.** Whole genome maximum likelihood phylogeny based on 42 SARS-CoV-2 isolates. Triangular tip labels depict autopsy samples. The autopsy samples were put into a local, as well as global context by randomly selecting 10 isolates each from New York State/California and 15 “global” isolates (see Materials and Methods). Scale bar depicts numbers of substitutions/per site. Lineage labels correspond to Nextclade (v.0.11.2) clades.

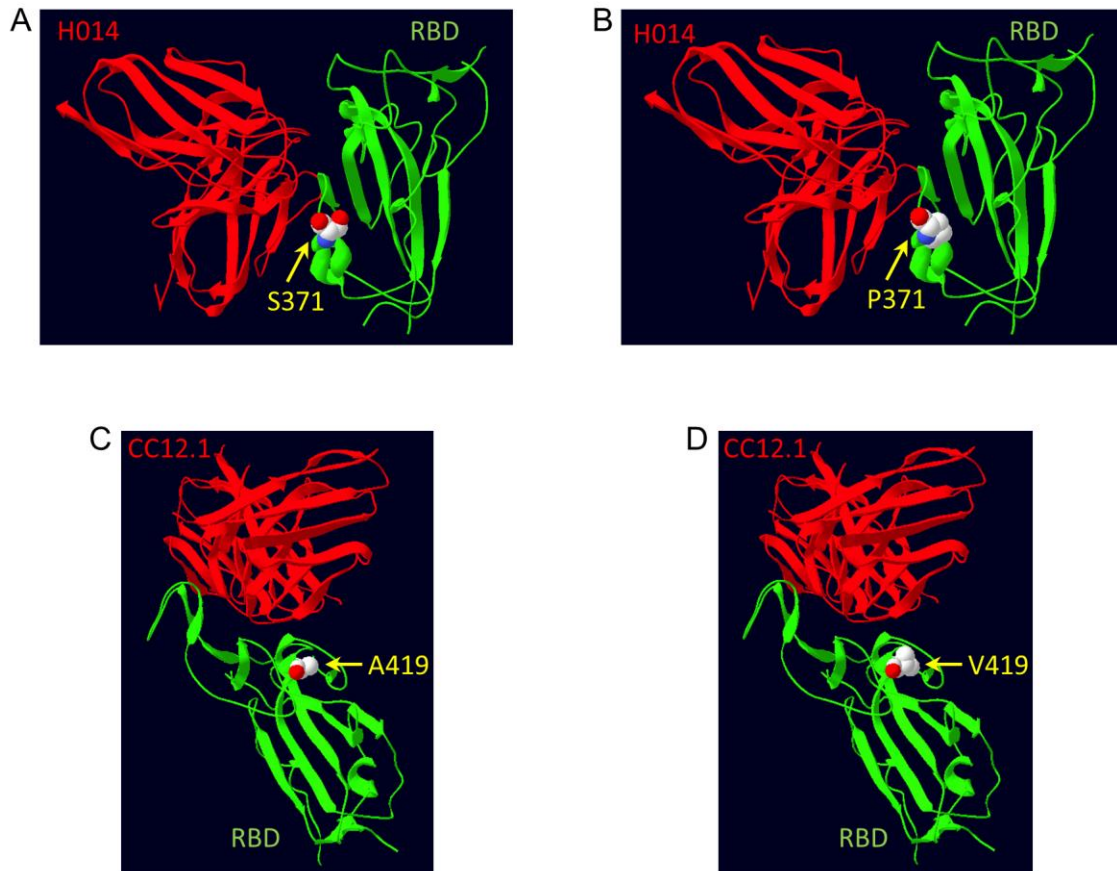

**Fig. S2. Structures of RBD SNP mutations with neutralizing antibodies.** The structures of 2 RBD SNP mutations related to neutralizing antibody H014 and CC12.1 (**A**) RBD S371 related to H014 (**B**) RBD P371 related to H014 (**C**) RBD A419 related to CC12.1 (**D**) RBD V419 related to CC12.1

**Fig. S3**

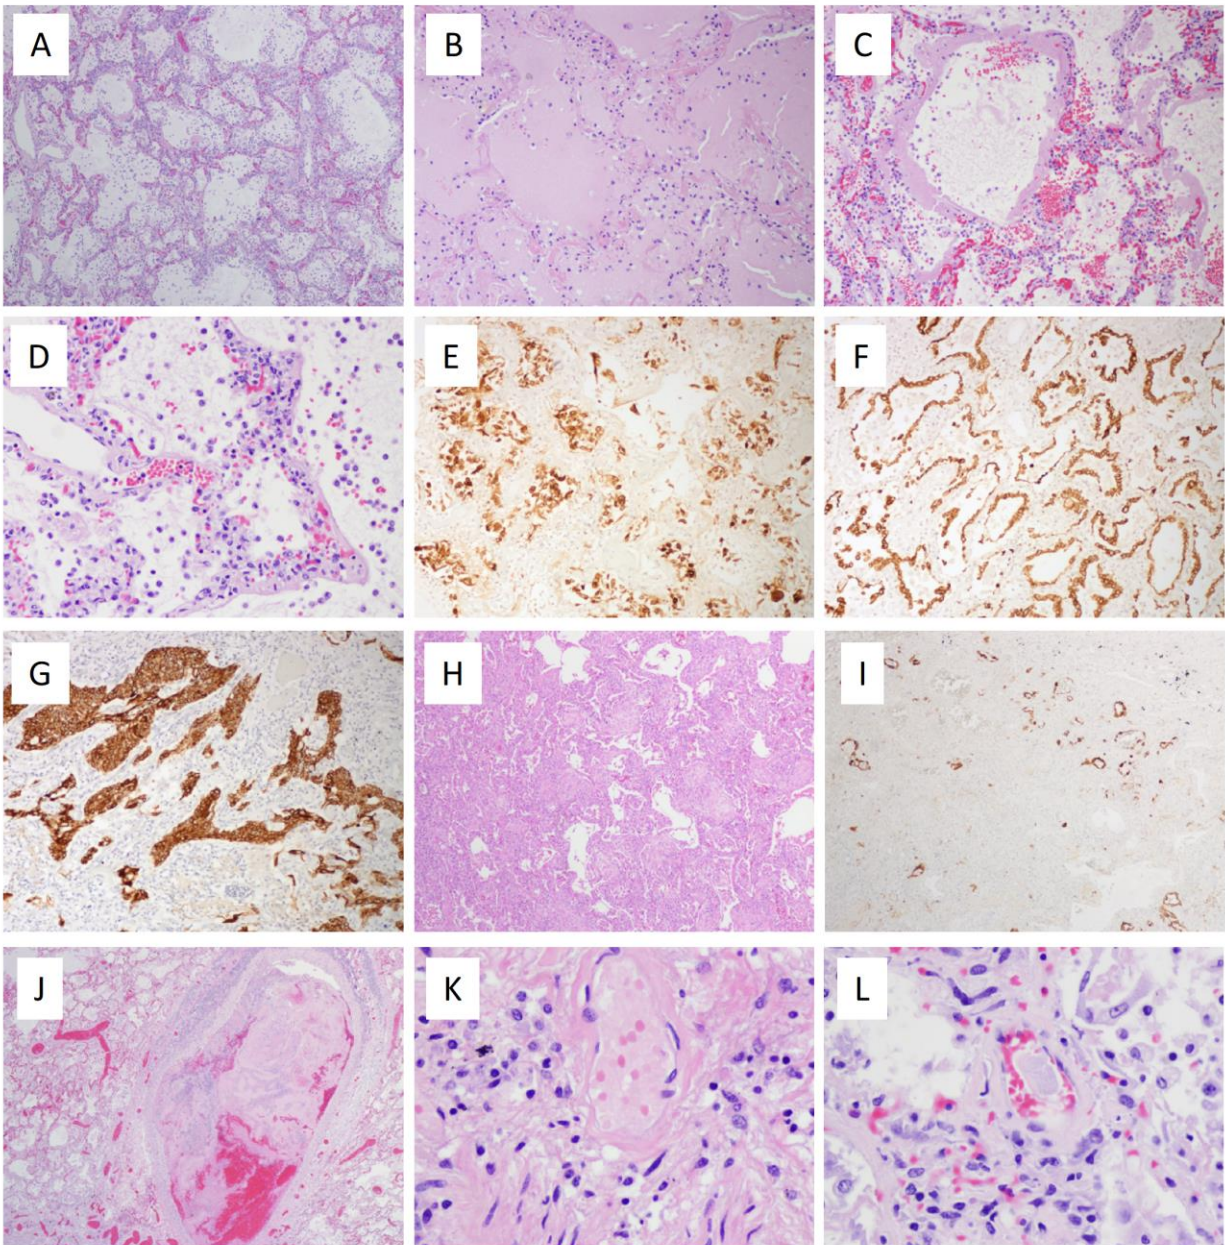

**Fig. S3. Overview of SARS-CoV-2 pulmonary pathology.** Examples of histopathological features seen in short (**A-E**), intermediate (**F** and **G**), and long SOTD cases (**H** and **I**), and representative vascular thrombi (**J-L**). (A) Acute diffuse alveolar damage (DAD), original magnification 100x. (B) Acute DAD with pulmonary edema and interstitial inflammation, original magnification 100x. (C) Acute DAD with hyaline membranes, original magnification 200x. (D) Acute DAD with luminal and interstitial neutrophilic infiltrates, original magnification 400x. (E) Abundant detached respiratory epithelial cells in alveolar lumina (cytokeratin stain), original magnification 100x. (F) Alveolar type II cell hyperplasia (cytokeratin stain), original magnification 100x. (G) Squamous metaplasia of the epithelium of bronchiole (cytokeratin stain), original magnification 100x. (H) Interstitial pulmonary fibrosis, original magnification 40x. (I) Loss of alveoli in fibrotic lung (cytokeratin stain), original magnification 40x. (J) Acute thrombus in a medium sized vessel, original magnification 40x. (K and L) Microvascular thrombi, original magnification 400x.

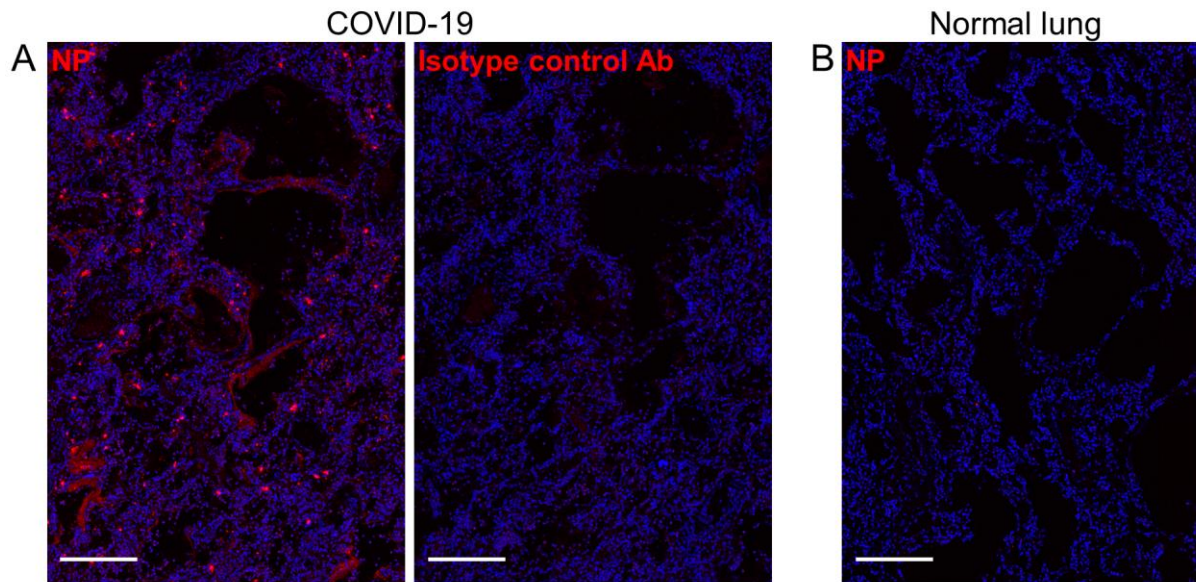

**Fig. S4. Antibody staining controls for SARS-CoV-2 nucleocapsid protein.** Serial sections from a COVID-19 lung (case 1) immunostained with (A) SARS-CoV-2 nucleocapsid protein (NP) antibody or a mouse isotype control antibody. (B) Negative NP immunoreactivity observed in a normal lung section from a non-COVID-19 patient. Nuclei were counterstained with Hoechst 33342 (blue). Scale bars: 250  $\mu$ m.

SARS-CoV-2 Nucleocapsid

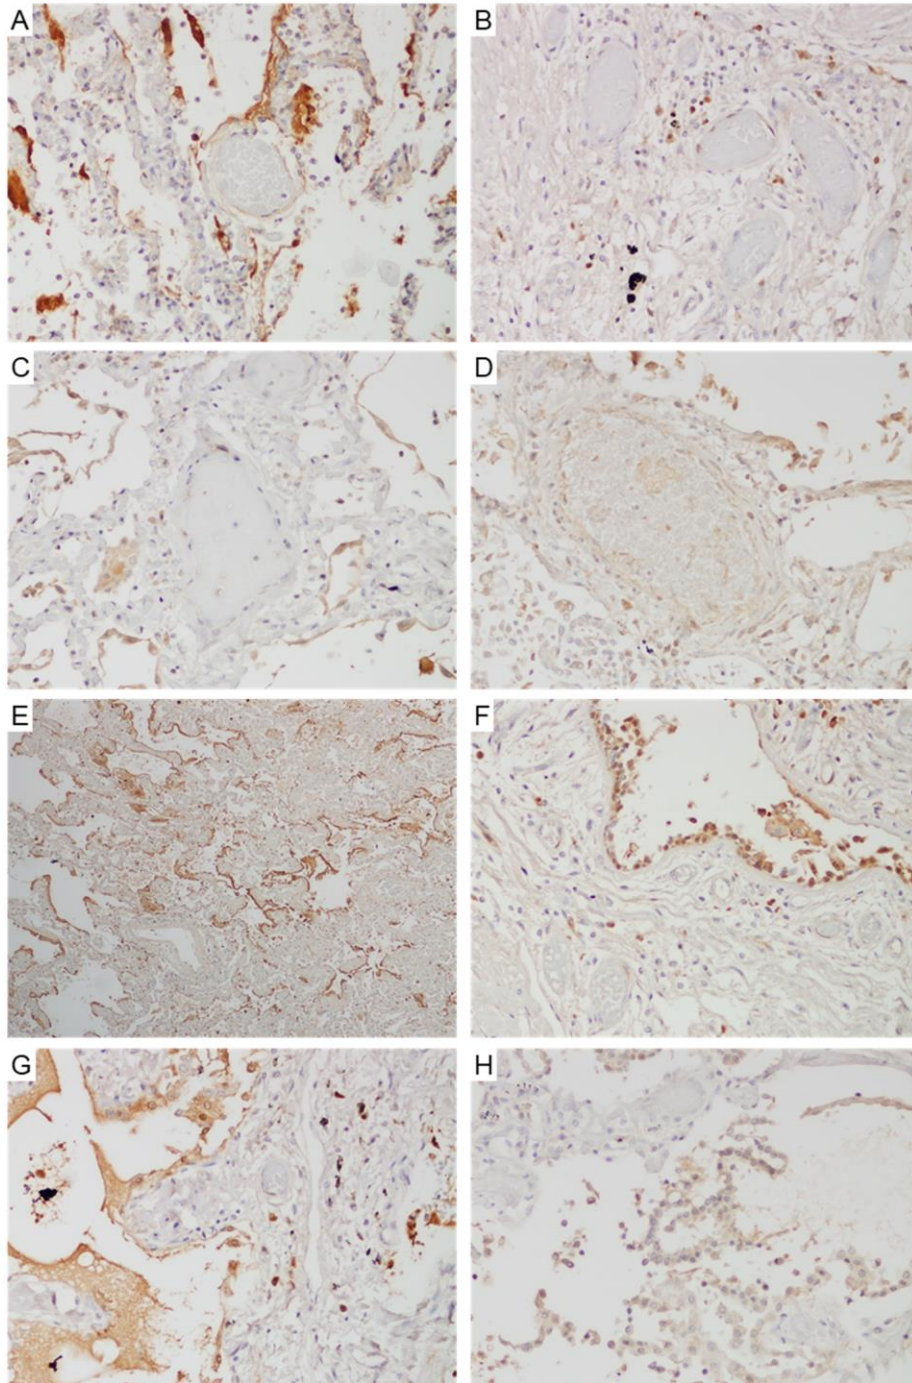

**Fig. S5. Pulmonary SARS-CoV-2 immunohistochemistry.** Representative staining of SARS-CoV-2 nucleocapsid protein (NP) in COVID-19 lung sections (cases 1 and 2). Weak but detectable NP staining in blood vessel lumens and endothelial cells (**A-D**) compared to marked NP deposition in hyaline membranes and sloughed alveolar/bronchiolar epithelium (**E-H**). Original magnification 200x.

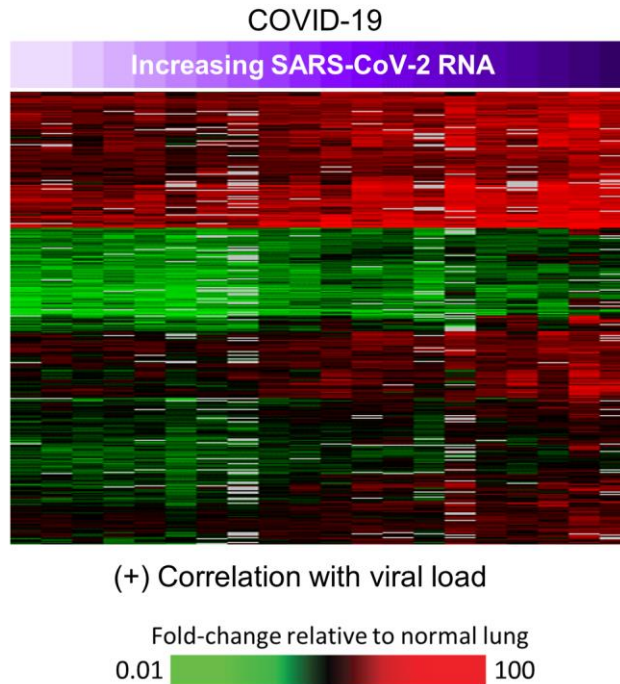

**Fig. S6. Pulmonary gene expression correlated positively with lung viral load.** Heatmap showing expression profiles of transcripts with expression levels that positively ( $n = 368$ ) correlated with SARS-CoV-2 viral load in lung tissue ( $\geq 0.6$ ). Each column represents gene expression data from a microarray experiment comparing patient lung tissue relative to pooled RNA isolated from normal lung tissue ( $n = 3$ ). Genes shown in red were increased, genes shown in green were decreased, and genes in black indicate no change in expression in COVID-19 relative to normal lung tissue. Levels of SARS-CoV-2 RNA are indicated by a purple gradient bar with values ranging from 0 to 44.9. Viral  $C_T$  values were normalized to the calibrator gene GAPDH and final  $C_T$  value inverted ( $40 - \Delta t$ ) such that a higher value represents a higher viral load (see methods).

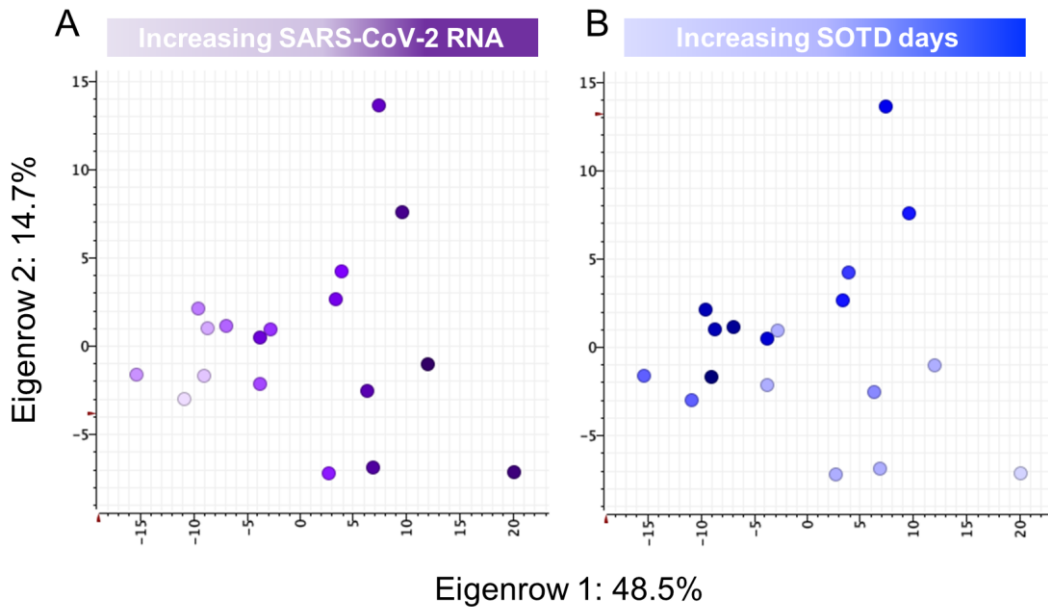

**Fig. S7. Pulmonary viral load and associated gene expression is inversely correlated with duration of clinical illness prior to death.** (A) Principal-component analysis (PCA) of viral load associated gene expression identified by Pearson correlation ( $>0.6$ ). Each participant is shown as a separate circle with viral load in lung tissue indicated using a purple gradient with values ranging from 0 to 44.9. Viral  $C_T$  values were normalized to the calibrator gene GAPDH and final  $C_T$  value inverted ( $40-\Delta t$ ) such that a higher value represents a higher viral load (see methods). (B) PCA of viral load associated gene expression showing days of symptom onset to death (SOTD) for each participant using a blue gradient.



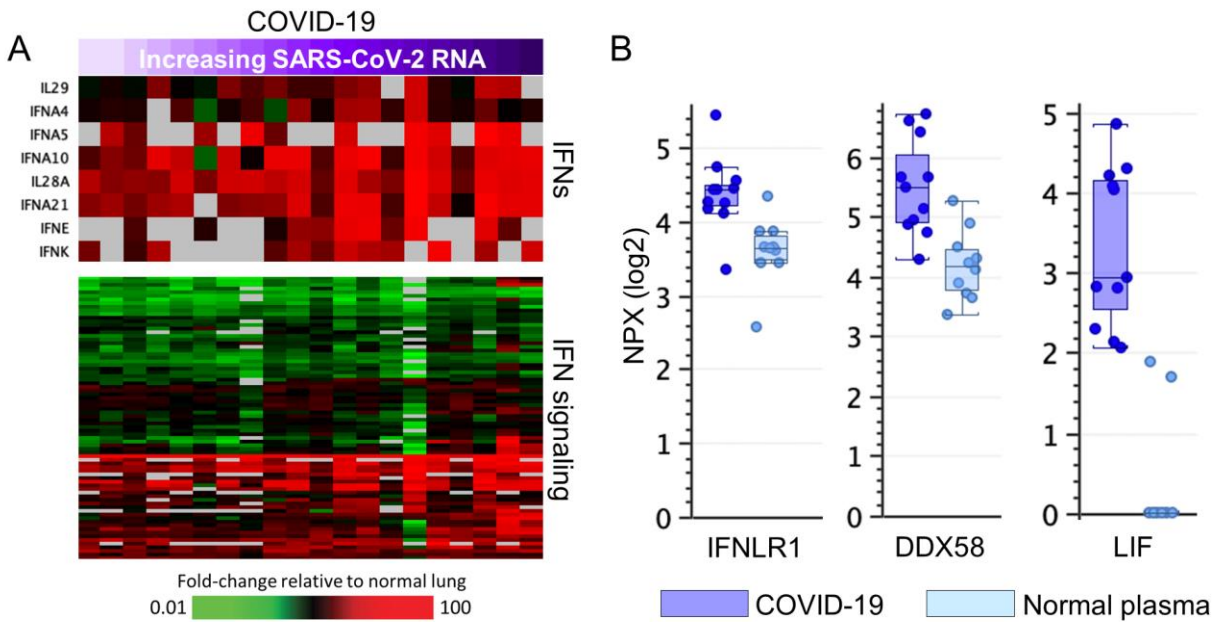

**Fig. S8. Induction of antiviral response in autopsy lung tissue from COVID-19 patients.**

(A) Heatmap showing expression levels of genes encoding interferons (IFN) and IFN-related signaling proteins. Each heatmap column represents gene expression data from a microarray experiment comparing patient lung tissue relative to pooled RNA isolated from normal lung tissue ( $n = 3$ ). Genes shown in red were increased, genes shown in green were decreased, and genes in black indicate no change in expression in COVID-19 relative to normal lung tissue. Levels of SARS-CoV-2 RNA in lung tissue are indicated by a purple gradient bar with values ranging from 0 to 44.9. Viral  $C_T$  values were normalized to the calibrator gene GAPDH and final  $C_T$  value inverted ( $40 - \Delta t$ ) such that a higher value represents a higher viral load (see methods). (B) Levels of antiviral-related proteins in plasma from COVID-19 ( $n = 6$ ) and healthy volunteers ( $n = 10$ ) measured by Olink platform. Values were statistically significant ( $p$  value  $< 0.05$ ) between the groups using standard t test. Scale of NPX value is  $\log_2$ .

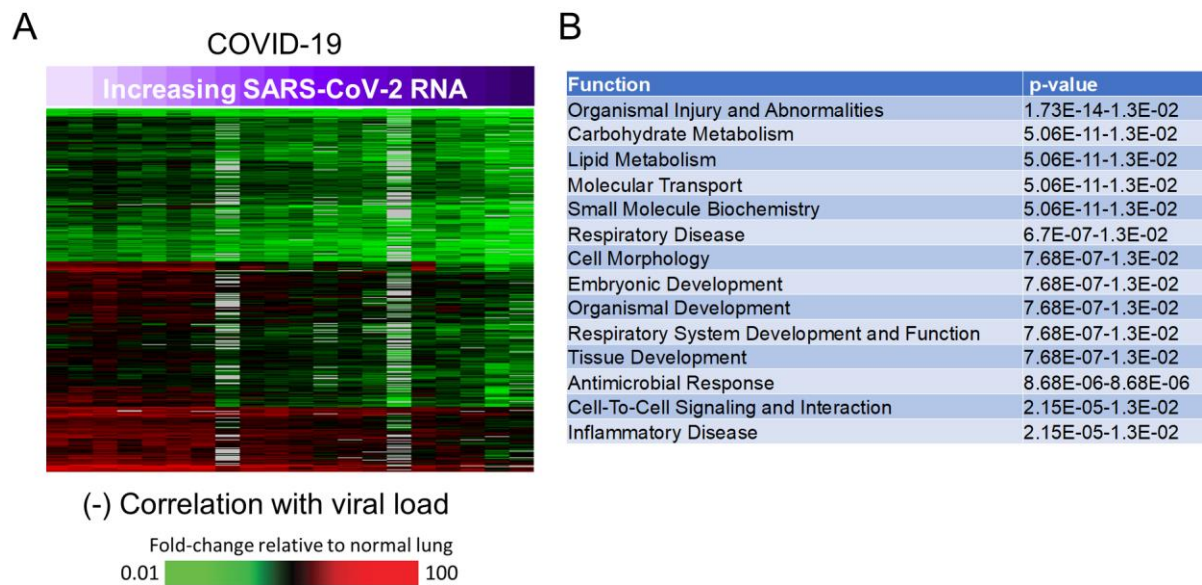

**Fig. S9. Pulmonary gene expression correlated negatively with lung viral load.** (A) Heatmap showing expression profiles of transcripts with expression levels that negatively ( $n = 450$ ) correlated with SARS-CoV-2 viral load in lung tissue ( $\geq 0.6$ ). Each column represents gene expression data from a microarray experiment comparing patient lung tissue relative to pooled RNA isolated from normal lung tissue ( $n = 3$ ). Genes shown in red were increased, genes shown in green were decreased, and genes in black indicate no change in expression in COVID-19 relative to normal lung tissue. Levels of SARS-CoV-2 RNA are indicated by a purple gradient bar with values ranging from 0 to 44.9. Viral  $C_T$  values were normalized to the calibrator gene GAPDH and final  $C_T$  value inverted ( $40 - \Delta t$ ) such that a higher value represents a higher viral load (see methods). (B) Gene ontology analysis showing enriched biological functions.

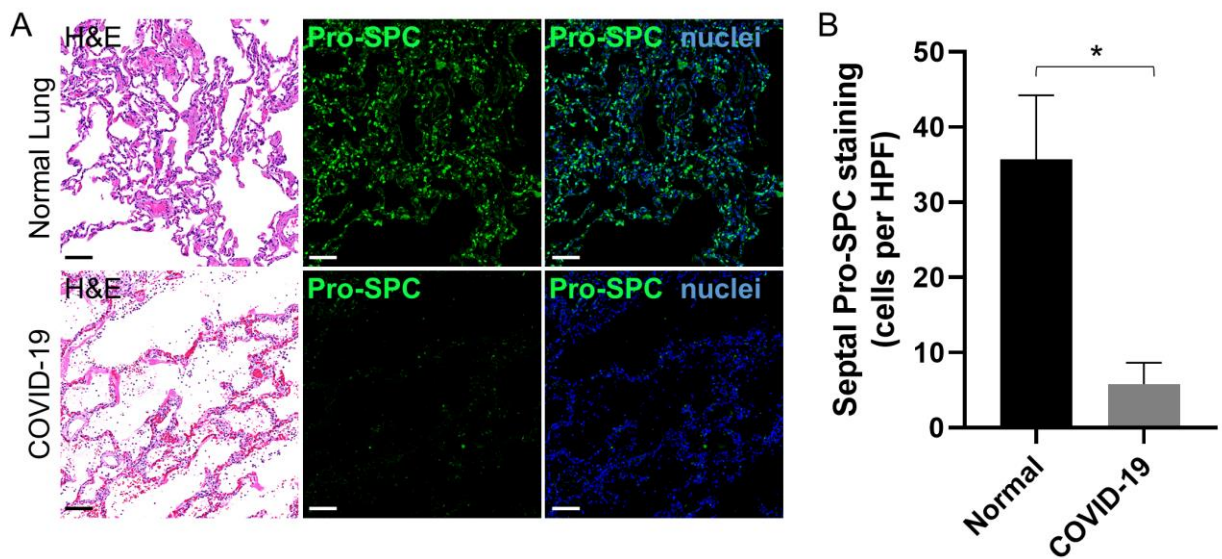

**Fig. S10. Reduced Pro-SPC expression in COVID-19 lungs.** (A) Representative H&E and immunofluorescence staining of prosurfactant protein C (Pro-SPC) in normal and COVID-19 lung (case 1). Normal lungs show distinct Pro-SPC-expressing AT2 cells populating the alveolar septa compared to marked loss of Pro-SPC staining in the COVID-19 lung. Nuclei were counterstained with Hoechst 33342 (blue). (B) Semiquantitative evaluation of Pro-SPC-expressing cells localized to the alveolar septa in normal (n = 5) and COVID-19 lung (n = 4 cases). Pro-SPC expressing cells in alveolar septa were counted, averaged, and a final count per high power field (HPF, n = 15 per section) was derived. Values are shown as the means  $\pm$  SEM for each group. \* $P < 0.05$ , Mann-Whitney test. Scale bars: 100  $\mu$ m.

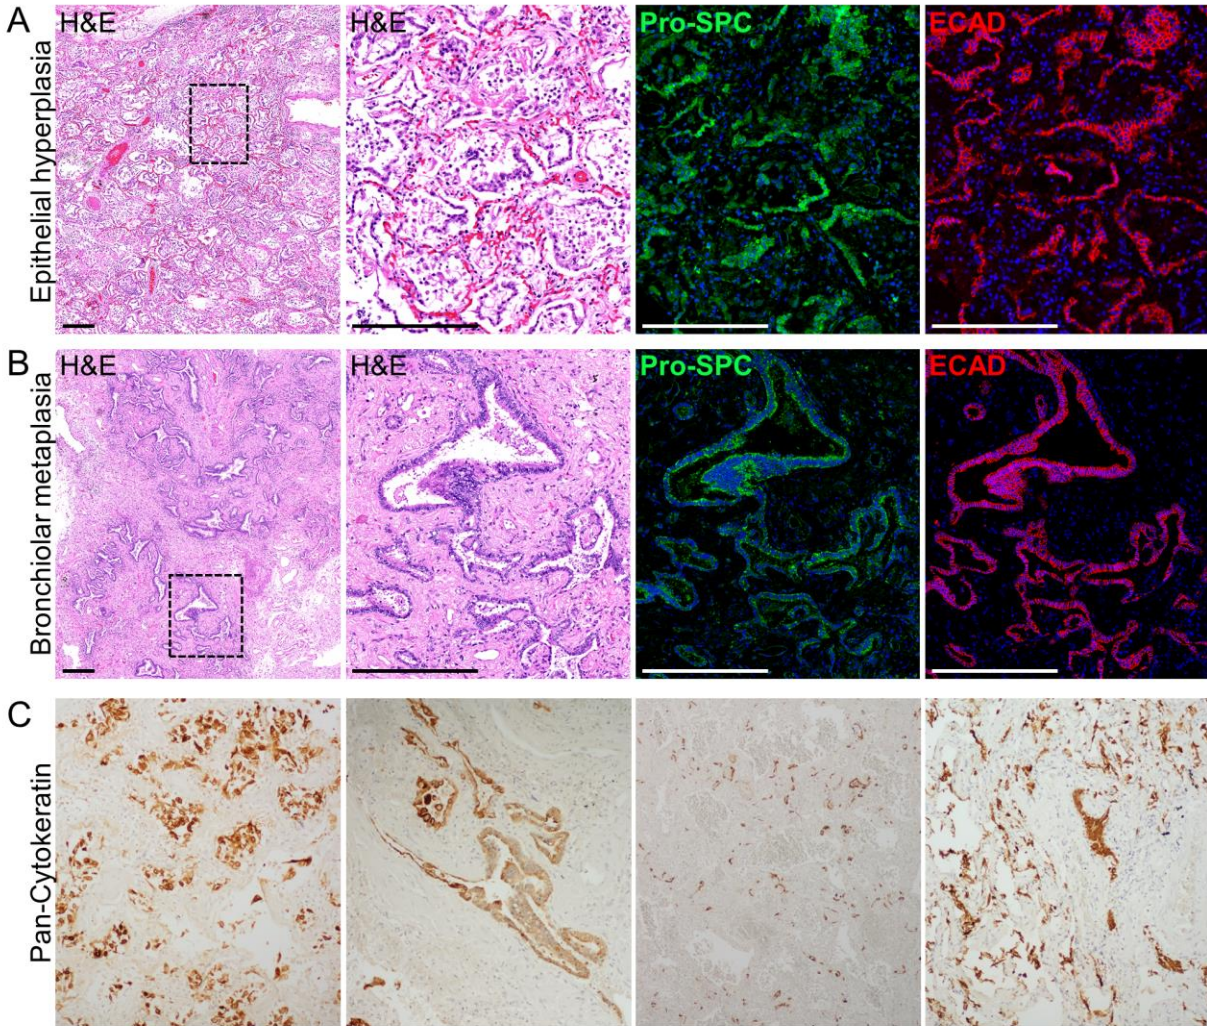

**Fig. S11. Organizing DAD with epithelial hyperplasia and bronchiolar metaplasia.** Representative images of COVID-19 lung sections with (A) epithelial hyperplastic and (B) bronchiolar metaplastic lesions serially stained for H&E, Pro-SPC, and E-cadherin (ECAD) (cases 11 and 13). Digitally magnified boxed areas in the low-power H&E panels highlight abnormal colocalized expression of Pro-SPC and ECAD with AT2 hyperplasia (A) and bronchiolization (B). Nuclei were counterstained with Hoechst 33342 (blue). (C) Pan-cytokeratin immunohistochemistry shows sloughed epithelial cells in alveolar spaces as well as abnormal expression in hyperplastic/metaplastic airway epithelium. Original magnification 200x (C). Scale bars: 250  $\mu$ m.

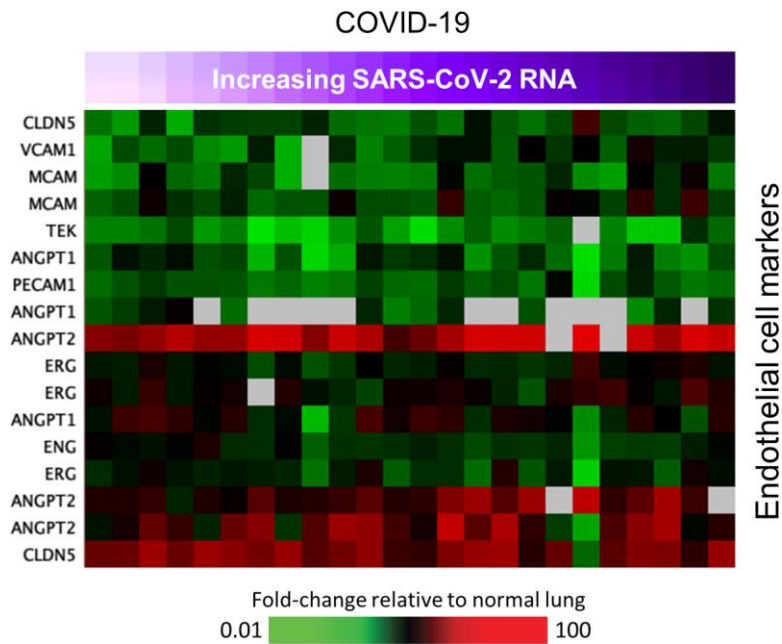

**Fig. S12. Loss of endothelial-related gene expression in COVID-19 lungs.** Heatmap showing expression profiles of transcripts encoding endothelial cell markers. Each column represents gene expression data from a microarray experiment comparing patient lung tissue relative to pooled RNA isolated from normal lung tissue (n = 3). Genes shown in red were increased, genes shown in green were decreased, and genes in black indicate no change in expression in COVID-19 relative to normal lung tissue. Levels of SARS-CoV-2 RNA are indicated by a purple gradient bar with values ranging from 0 to 44.9. Viral  $C_T$  values were normalized to the calibrator gene GAPDH and final  $C_T$  value inverted ( $40 - \Delta t$ ) such that a higher value represents a higher viral load (see methods).

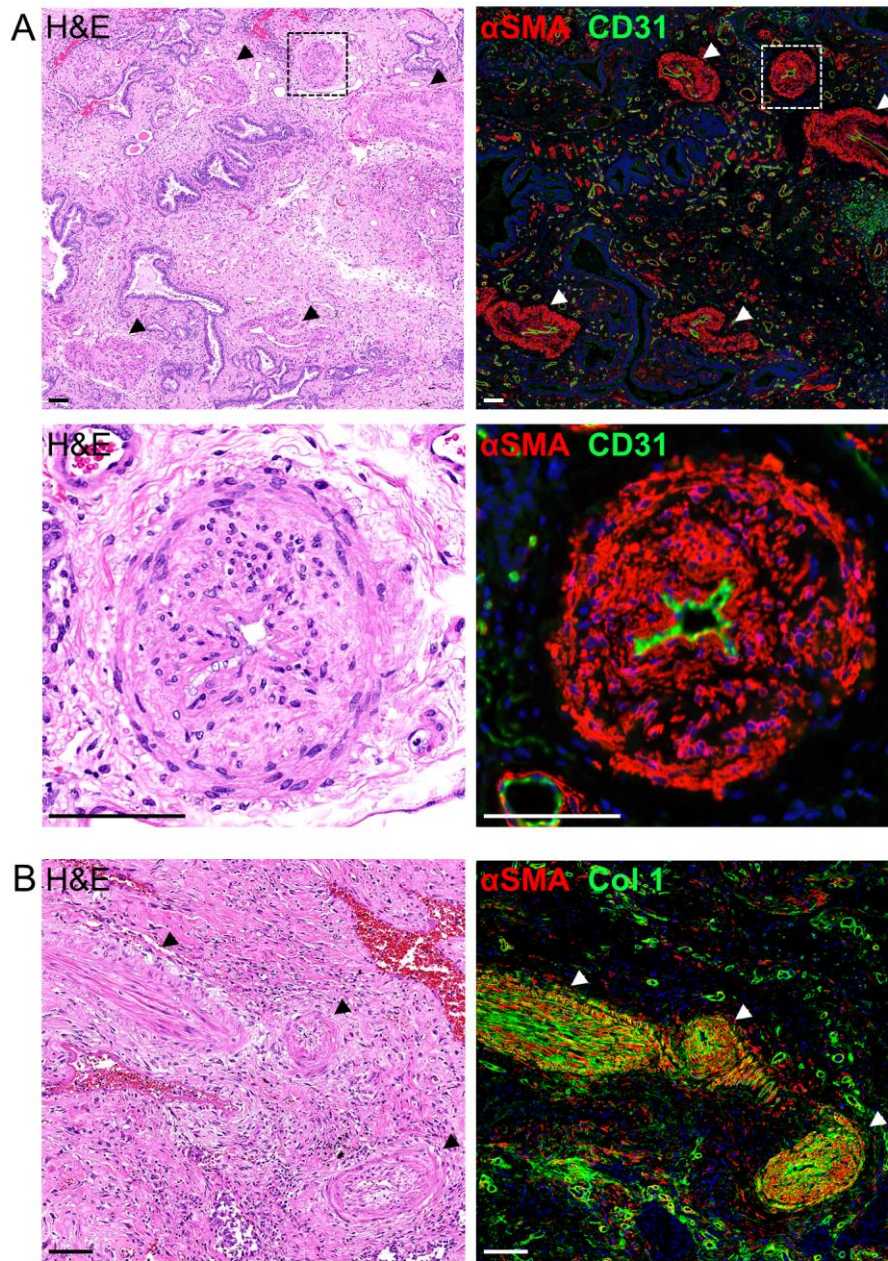

**Fig. S13. Pulmonary vascular remodeling in COVID-19 lungs.** (A and B) Representative images of vascular remodeled large blood vessels (arrowheads) in serial COVID-19 lung sections stained for H&E,  $\alpha$ SMA, and CD31 or collagen type 1 (Col 1) (cases 17 and 18). High power magnification of the boxed area in (A) depicts a remodeled vessel with significant  $\alpha$ SMA-positive tunica media hypertrophy and severely constricted lumen bordered by CD31-positive endothelium. (B) Vascular remodeling with excessive  $\alpha$ SMA and Col 1 deposition in vessel walls (arrowheads). Nuclei were counterstained with Hoechst 33342 (blue). Scale bars: 100  $\mu$ m.

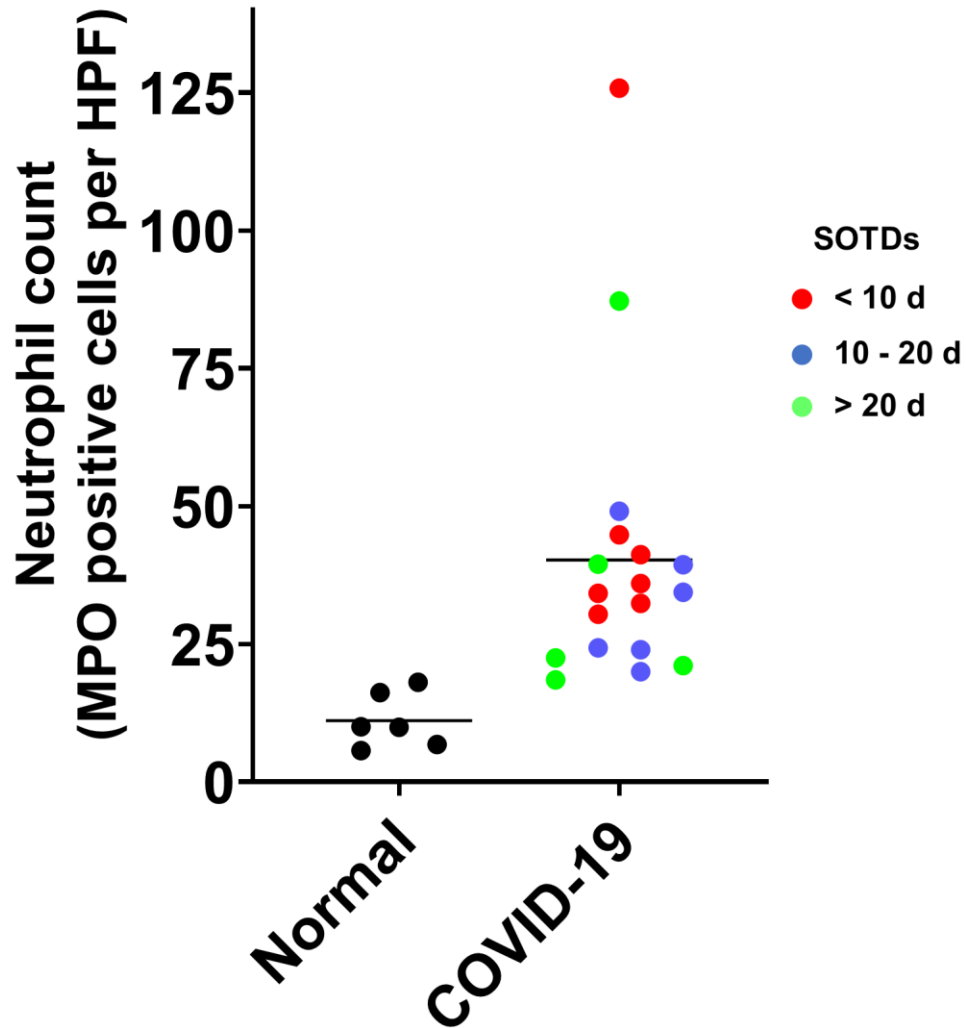

**Fig. S14. Semiquantitative analysis of pulmonary neutrophils in COVID-19 patients.** Lung sections from non-COVID-19 individuals (n = 6) and COVID-19 cases (n = 18) were stained by MPO immunofluorescence. MPO positive cells were counted, averaged, and a final count per high power field (HPF, n = 20 – 25 per section) was derived (see Supplementary Methods). COVID-19 cases are grouped and color coded based on symptom onset to death times (SOTDs) (red, < 10 days; blue, 10 - 20 days; green, > 20 days). Mean values for each case (circles) and each dataset (horizontal bars) are shown.  $P < 0.05$ , normal vs. COVID-19; Mann-Whitney test.

Fig. S15

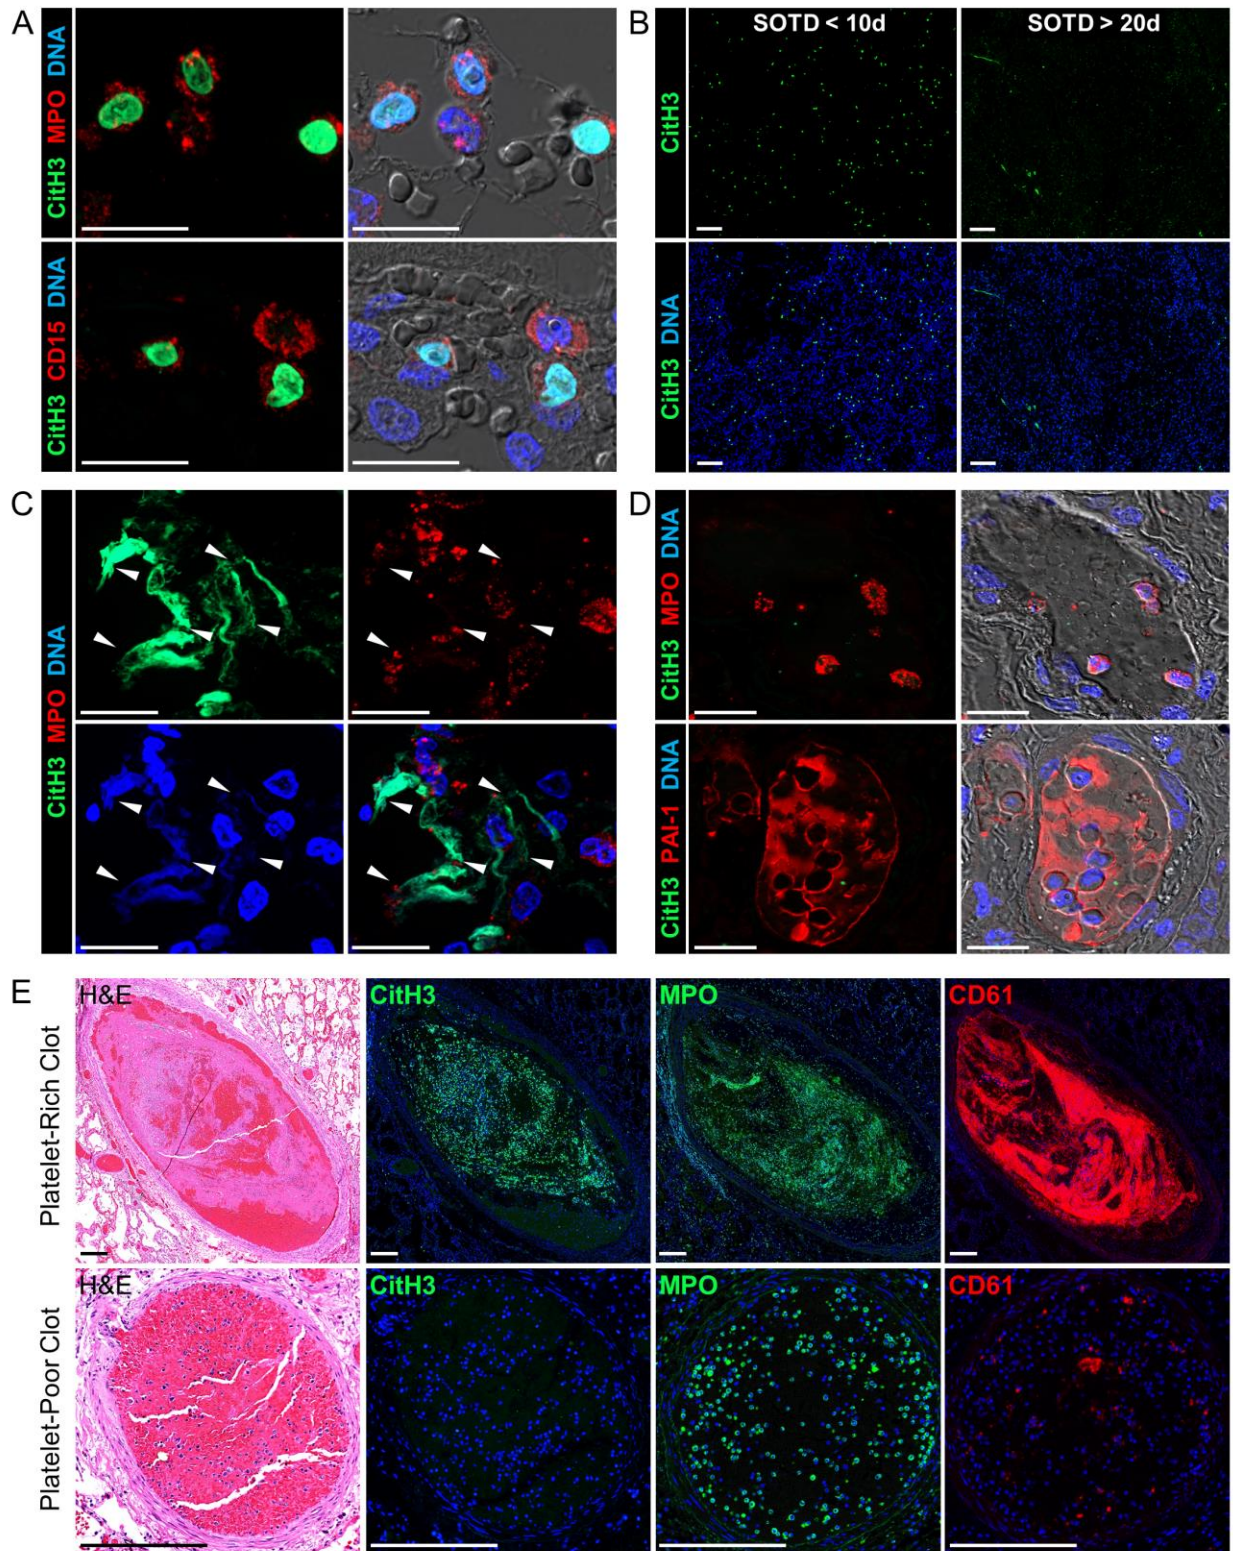



**Fig. S15. Immunomarkers of neutrophil NETs in COVID-19 lungs.** (A) Nuclear expression of citrullinated histone H3 (CitH3) in MPO- and CD15-positive intraalveolar neutrophils in lung sections from a COVID-19 patient with short clinical illness duration (case 2). (B) Representative low-power images of CitH3-positive nuclei in lung sections from COVID-19 patients with short (SOTD < 10 d) and long illness duration (SOTD > 20 d) (case 1 and 16). (C) Representative intraalveolar NETs stained for CitH3, MPO, and DNA. Arrowheads depict structures with colocalized expression of CitH3, MPO, and cell-free DNA. (D) Red blood cell-packed thrombi in COVID-19 lung showing negative staining for CitH3 in MPO and PAI-1 labeled neutrophils. (E) Representative platelet-rich and platelet-poor thrombi stained for CitH3, MPO, and platelet marker CD61. Extensive CitH3 staining is embedded within the platelet-rich clot colocalized with extensive MPO and CD61 compared to platelet-poor clots that show negative CitH3 staining even in the presence of a high number of MPO-positive neutrophils. Nuclei and cell-free DNA were counterstained with Hoechst 33342 (blue). Scale bars: 20  $\mu\text{m}$  (A, C, and D); 100  $\mu\text{m}$  (B); 250  $\mu\text{m}$  (E).

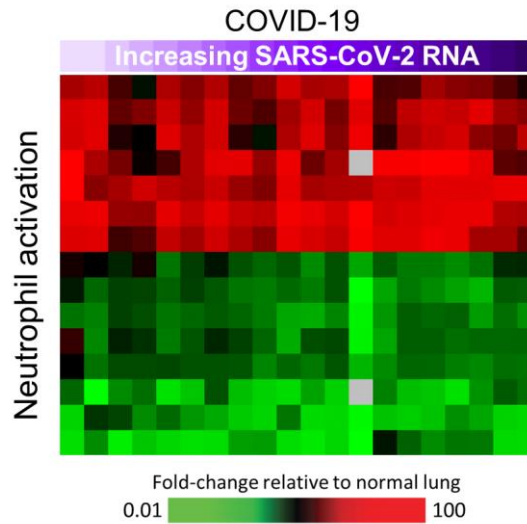

**Fig. S16. Pulmonary gene expression associated with neutrophil function.** Each column represents gene expression data from a microarray experiment comparing patient lung tissue relative to pooled RNA isolated from normal lung tissue ( $n = 3$ ). Genes shown in red were increased, genes shown in green were decreased, and genes in black indicate no change in expression in COVID-19 relative to normal lung tissue. Levels of SARS-CoV-2 RNA are indicated by a purple gradient bar with values ranging from 0 to 44.9. Viral  $C_T$  values were normalized to the calibrator gene GAPDH and final  $C_T$  value inverted ( $40 - \Delta t$ ) such that a higher value represents a higher viral load (see methods).

**Fig. S17**

**A**

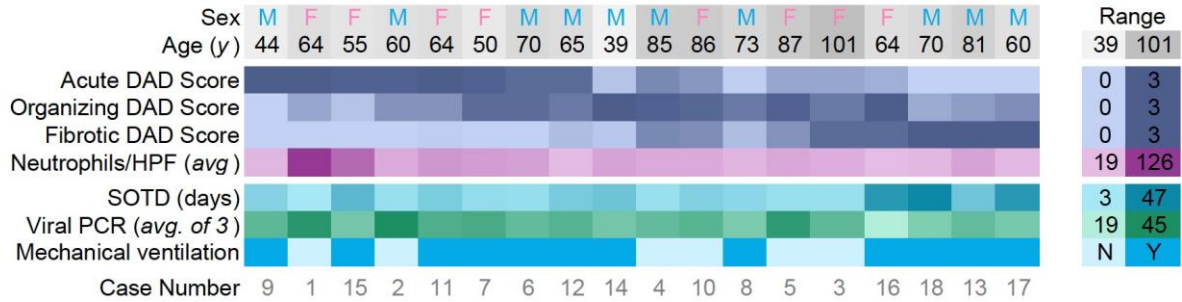

**B**

**Correlation**

|                               | Age (y)      | Acute DAD Score | Organizing DAD Score | Fibrotic DAD Score | Neutrophils/HPF | Symptom Onset to Death (SOTD) | SARS-CoV-2 Viral PCR |
|-------------------------------|--------------|-----------------|----------------------|--------------------|-----------------|-------------------------------|----------------------|
| Age (y)                       | 1            |                 |                      |                    |                 |                               |                      |
| Acute DAD Score               | -0.293       | 1               |                      |                    |                 |                               |                      |
| Organizing DAD Score          | 0.32         | -0.267          | 1                    |                    |                 |                               |                      |
| Fibrotic DAD Score            | <b>0.565</b> | <b>-0.76</b>    | 0.166                | 1                  |                 |                               |                      |
| AVG Neutrophils/HPF           | -0.143       | 0.458           | -0.34                | -0.431             | 1               |                               |                      |
| Symptom Onset to Death (SOTD) | -0.225       | <b>-0.528</b>   | -0.169               | <b>0.555</b>       | -0.325          | 1                             |                      |
| SARS-CoV-2 Viral RNA          | 0.091        | <b>0.538</b>    | -0.109               | -0.448             | 0.395           | <b>-0.722</b>                 | 1                    |

**C**

**P-value**

|                               | Age (y)      | Sex   | Acute DAD Score | Organizing DAD Score | Fibrotic DAD Score | Neutrophils/HPF | Symptom Onset to Death (SOTD) | SARS-CoV-2 Viral PCR |
|-------------------------------|--------------|-------|-----------------|----------------------|--------------------|-----------------|-------------------------------|----------------------|
| Age (y)                       |              |       |                 |                      |                    |                 |                               |                      |
| Sex                           | 0.408        |       |                 |                      |                    |                 |                               |                      |
| Acute DAD Score               | 0.238        | 0.222 |                 |                      |                    |                 |                               |                      |
| Organizing DAD Score          | 0.196        | 0.655 | 0.283           |                      |                    |                 |                               |                      |
| Fibrotic DAD Score            | <b>0.015</b> | 0.845 | <b>0.00026</b>  | 0.510                |                    |                 |                               |                      |
| AVG Neutrophils/HPF           | 0.572        | 0.109 | 0.056           | 0.168                | 0.074              |                 |                               |                      |
| Symptom Onset to Death (SOTD) | 0.369        | 0.548 | <b>0.024</b>    | 0.503                | <b>0.017</b>       | 0.188           |                               |                      |
| SARS-CoV-2 Viral RNA          | 0.719        | 0.617 | <b>0.021</b>    | 0.667                | 0.063              | 0.104           | <b>0.001</b>                  |                      |
| Mechanical ventilation        | <b>0.029</b> | 0.321 | 0.475           | 0.320                | 0.704              | 0.460           | <b>0.003</b>                  | <b>0.018</b>         |

**Fig. S17. Statistical analysis of diffuse alveolar damage (DAD) progression.** Relationships between the stage of DAD, neutrophil counts, time of symptom onset to death (SOTD), SARS-CoV-2 viral RNA, and mechanical ventilation status. **(A)** Heatmap showing blind histologic scoring (see Supplementary Methods) of acute, organizing, and fibrotic DAD is shown by purple gradient. Neutrophil counts per high power field (HPF; see Methods) are shown by magenta gradient; SOTD is shown by blue gradient; SARS-CoV-2 RNA concentration, as determined by qPCR (see Methods), is shown by green gradient; and mechanical ventilation status and case number are shown at bottom. For each of these gradient scales, increasing color indicates increasing values, as shown in key on right. **(B)** Statistical analysis. For pairwise comparison of two continuous variables, Pearson's correlation test was used. **(C)** For pairwise comparison contained one categorical variable (e.g. sex or mechanical ventilation), a t-test was used to calculate p-value, without equal variance assumption. For sex vs. mechanical ventilation, a Fisher's exact test was used to test independence.

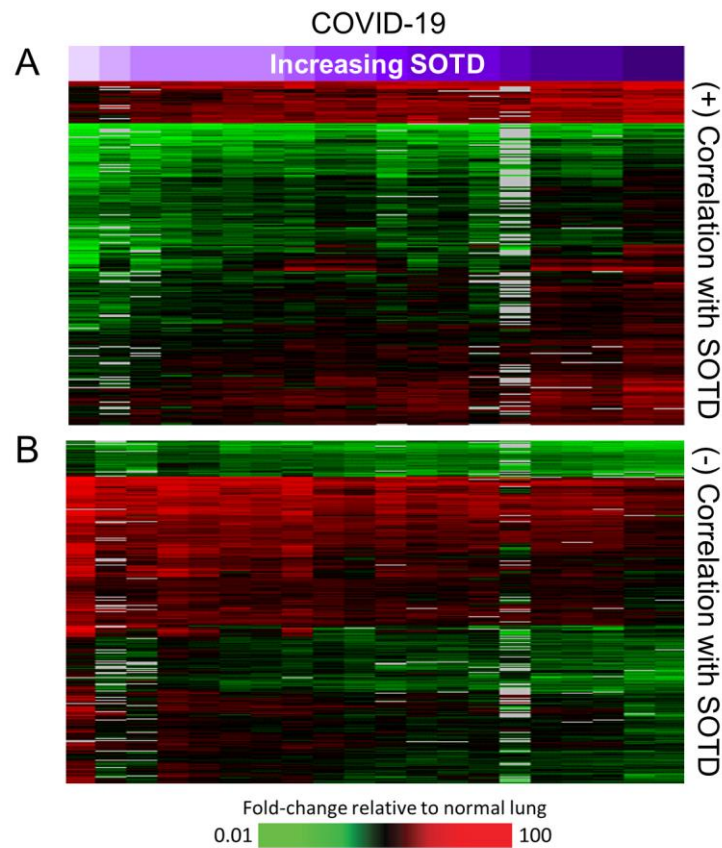

**Fig. S18. Pulmonary gene expression correlated with duration of clinical illness.** Heatmap showing expression profiles of transcripts with expression levels that (A) positively (n = 263) and (B) negatively (n = 333) correlated with days of symptom onset to death (SOTD) in lung tissue ( $\geq 0.6$ ). Each heatmap column represents gene expression data from a microarray experiment comparing patient lung tissue relative to pooled RNA isolated from normal lung tissue (n = 3). Genes shown in red were increased, genes shown in green were decreased, and genes in black indicate no change in expression in COVID-19 relative to normal lung tissue. Days of SOTD are indicated by a purple gradient bar.

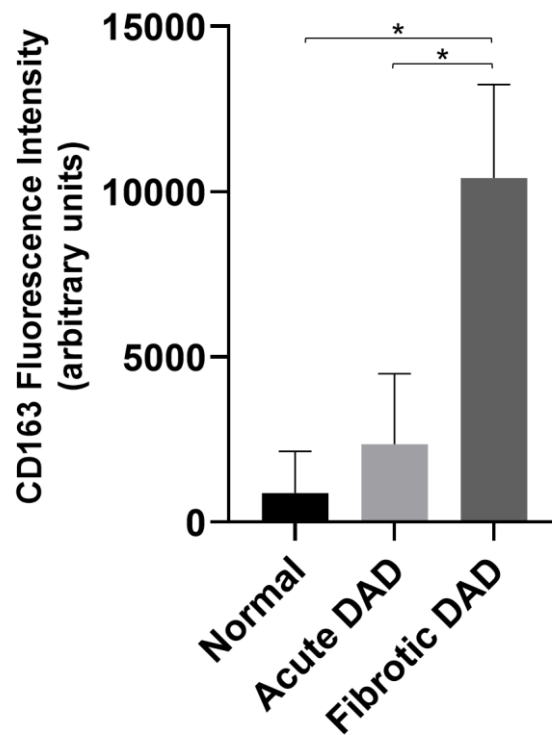

**Fig. S19. Semiquantitative analysis of CD163 immunofluorescence in COVID-19 lungs.**

Macrophage CD163 immunofluorescence image analysis was performed on lung sections from non-COVID-19 patients (n = 3) and COVID-19 cases with predominant acute DAD (n = 5) or fibrotic DAD (n = 4). High resolution images of CD163-stained sections were acquired at 200x magnification and fluorescence intensity measurements were processed by Fiji/ImageJ software (see Supplementary Methods). Values are reported as the means  $\pm$  SD for each indicated dataset.

\* $P < 0.05$ , one-way ANOVA and Tukey post hoc test.

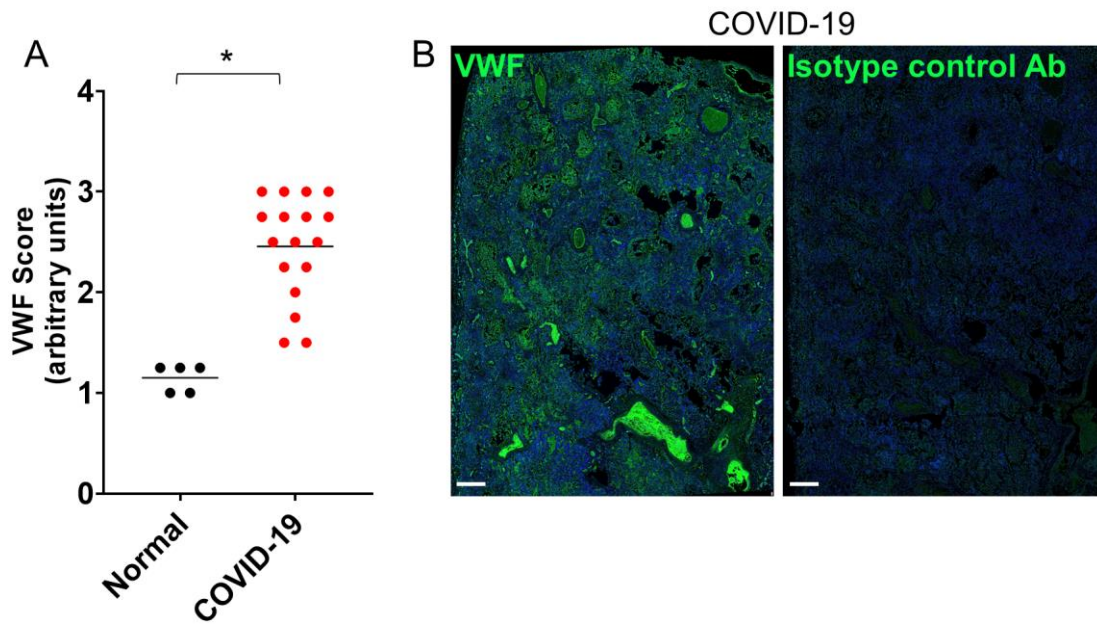

**Fig. S20. Semiquantitative analysis of VWF immunofluorescence in COVID-19 lungs.** (A) VWF immunofluorescence scoring analysis in lung sections from non-COVID-19 patients (n = 5) and COVID-19 cases (n = 17). VWF staining intensity and localization were graded on a scale of 0 - 3 (see Supplementary Methods). Average scores for each case (circles) and the mean of each dataset (horizontal bars) are shown. \* $P < 0.05$ , Mann-Whitney test. (B) Serial lung sections from a COVID-19 lung (case 11) stained with VWF primary antibody or rabbit isotype control antibody. Nuclei were counterstained with Hoechst 33342 (blue). Scale bars: 500  $\mu\text{m}$ .

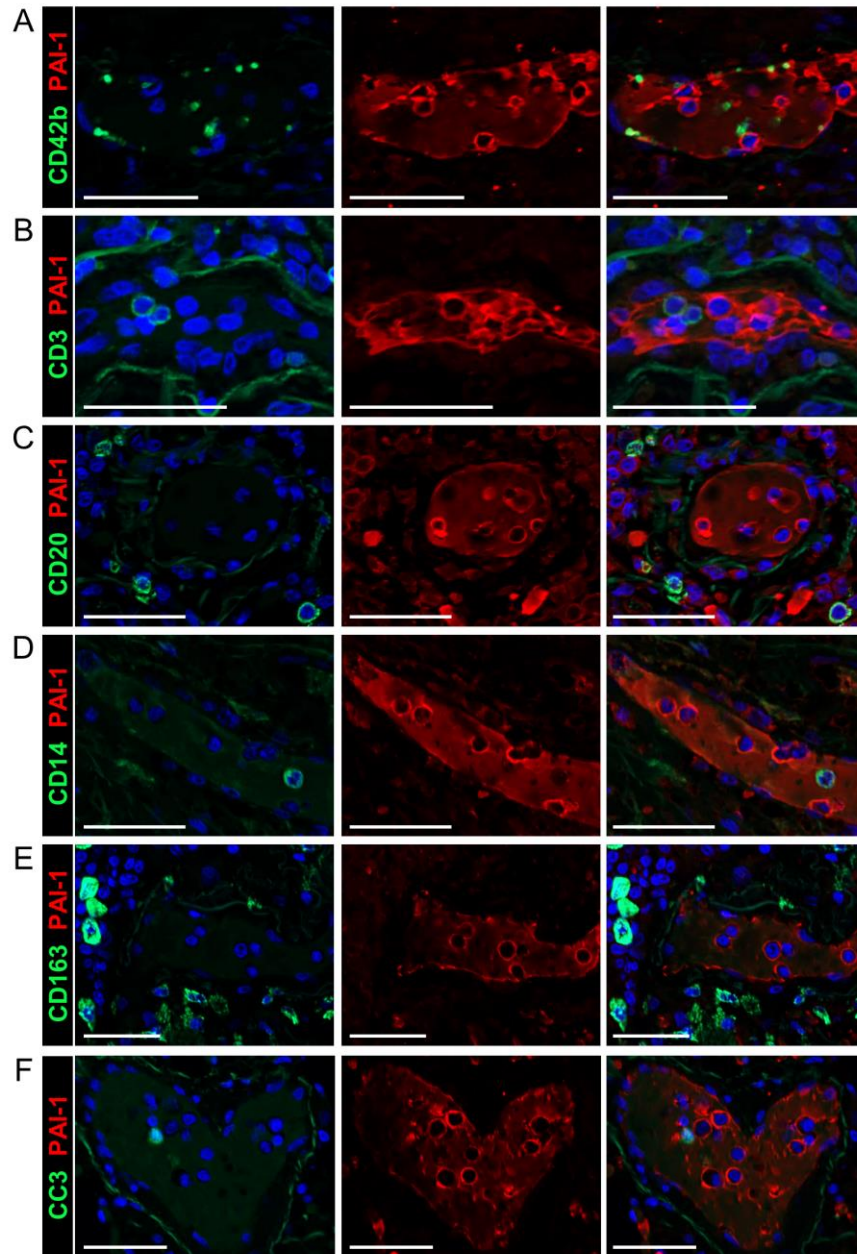

**Fig. S21. Clot-entrapped PAI-1 labeled cells do not stain for non-neutrophil immune cells or cleaved caspase 3.** Representative immunofluorescence images of pulmonary clots in COVID lungs stained for PAI-1 and common immunomarkers of (A) platelets/ megakaryocytes (CD42b), (B) T-lymphocytes (CD3), (C) B-lymphocytes (CD20), (D and E) monocytes and macrophages (CD14 and CD163) and (F) apoptotic marker cleaved caspase 3 (CC3). Nuclei were counterstained with Hoechst 33342 (blue). Scale bars: 50  $\mu$ m.



Fig. S22

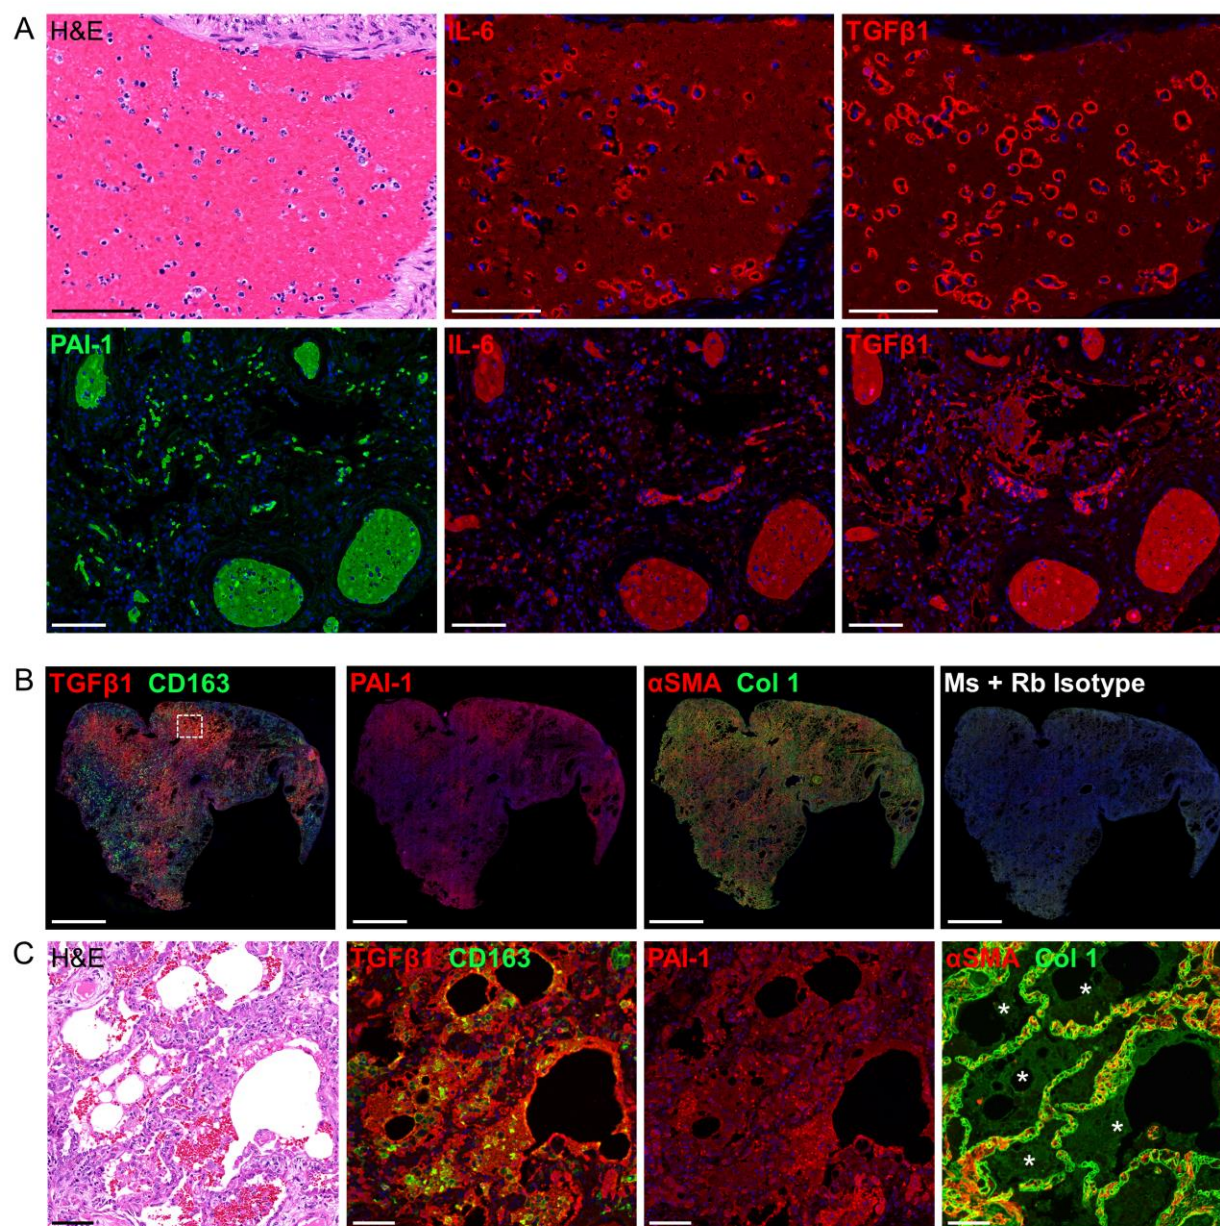

**Fig. S22. Increased expression of IL-6 and TGFβ1 in COVID-19 lungs.** (A) Representative H&E and immunofluorescence staining of IL-6, TGFβ1, and PAI-1 in serial COVID-19 lung sections (case 10). (B) Serial lung sections in a COVID-19 patient (case 16) with long duration illness stained for PAI-1, TGFβ1, CD163, αSMA, collagen type 1 (Col 1), and isotype mouse and rabbit antibodies. Low-power images show widespread colocalization of PAI-1 and TGFβ1 in fibrotic lung tissue with excessive CD163-positive macrophages and interstitial αSMA and Col 1 deposition. No staining was observed with mouse and rabbit isotype control antibodies. (C) H&E and immunofluorescence images of the digitally magnified boxed area in (B) demonstrate the overlapping staining distribution of PAI-1 and TGFβ1 in alveolar spaces co-expressing CD163-positive macrophages and loose Col 1 deposition but limited αSMA staining (asterisks). Nuclei were counterstained with Hoechst 33342 (blue). Scale bars: 100 μm (A and C); 5000 μm (B).

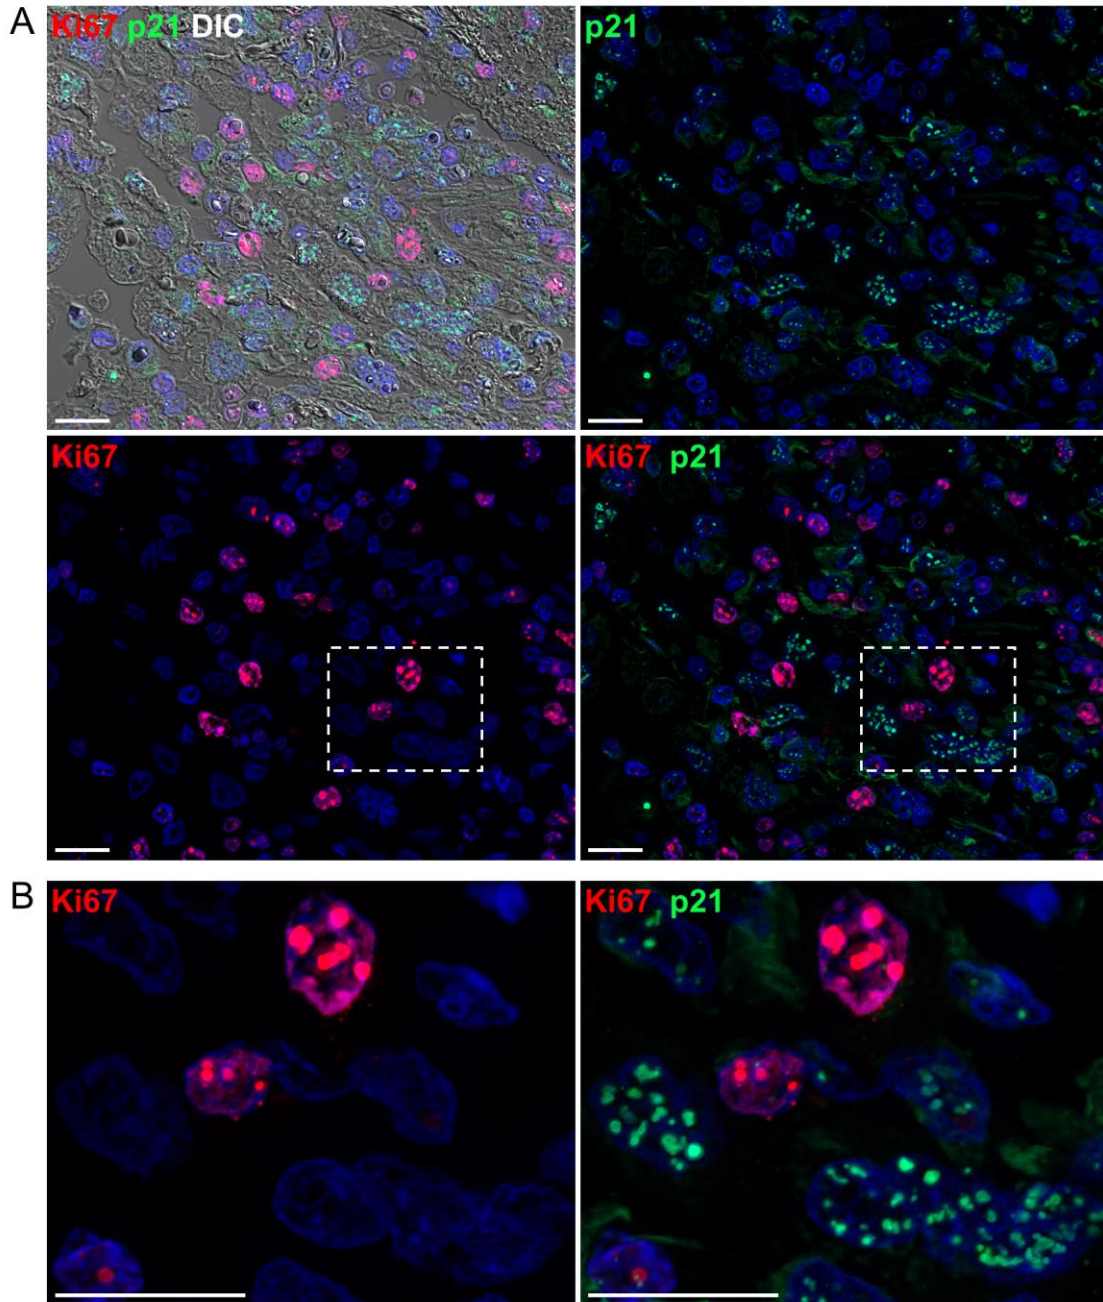

**Fig S23. Lack of Ki67 expression in nuclear p21-positive senescent lung cells.** (A) Representative DIC and immunofluorescence staining of proliferation marker Ki67 and p21 in an epithelial hyperplastic lesion in a COVID-19 lung (case 4). (B) High power imaging of the boxed area depicts the absence of Ki67 labeling in p21-expressing senescent cells. Nuclei were counterstained with Hoechst 33342 (blue). Scale bars: 20  $\mu$ m.

**Table S1. Known comorbidities and available laboratory testing**

| Case No. | Age (y) | Sex | Time of Symptom Onset to Death, SOTD (days) | Known Comorbidities                           | C-Reactive Protein (mg/dL)* | Ferritin (ng/mL)* | D-dimer ( $\mu$ g/mL FEU)* |
|----------|---------|-----|---------------------------------------------|-----------------------------------------------|-----------------------------|-------------------|----------------------------|
| 1        | 64      | F   | 3                                           | Obesity, Type II DM, COPD, Hx lung carcinoma  | NA                          | NA                | NA                         |
| 2        | 60      | M   | 7                                           | Obesity, Type II DM, CAD                      | NA                          | NA                | NA                         |
| 3        | 101     | F   | 7                                           | HTN, Hx cancer, dementia, chronic steroid use | 6.8 (4.9)                   | NA                | 10.2 (8.9)                 |
| 4        | 85      | M   | 7                                           | HTN, CAD                                      | 19.4 (2.2)                  | 386 (59)          | 4.7 (1.4)                  |
| 5        | 87      | F   | 7                                           | HTN, CAD, Type II DM, Dementia                | 9.8                         | 3303              | 4.3                        |
| 6        | 70      | M   | 8                                           | Obesity                                       | 4.9 (1.2)                   | 10362 (12093)     | 9.8 (0.1)                  |
| 7        | 50      | F   | 9                                           | Type II DM, HTN                               | NA                          | NA                | NA                         |
| 8        | 73      | M   | 11                                          | HTN, Type II DM, COPD                         | 8.3 (3.0)                   | 1300 (195)        | 2.3 (0.3)                  |
| 9        | 44      | M   | 13                                          | Obesity, Type II DM, HTN, Hx renal carcinoma  | NA                          | NA                | NA                         |
| 10       | 86      | F   | 14                                          | Hx cancer                                     | 7.6 (5.6)                   | 1258 (201)        | 1.2 (0.5)                  |
| 11       | 64      | F   | 16                                          | Obesity, HTN                                  | NA                          | NA                | NA                         |
| 12       | 65      | M   | 17                                          | Type II DM, HTN, peripheral vascular disease  | NA                          | NA                | NA                         |
| 13       | 81      | M   | 19                                          | Obesity, HTN                                  | 7.6 (7.4)                   | 2574 (8354)       | 5.2 (3.8)                  |
| 14       | 39      | M   | 20                                          | Obesity                                       | NA                          | NA                | NA                         |
| 15       | 55      | F   | 25                                          | Obesity                                       | NA                          | NA                | NA                         |
| 16       | 64      | F   | 40                                          | COPD, HTN                                     | 3.6 (4.2)                   | 221 (152)         | 8.2 (3.6)                  |
| 17       | 60      | M   | 40                                          | Obesity                                       | 15.4 (6.9)                  | 1411 (578)        | 7.2 (3.7)                  |
| 18       | 70      | M   | 47                                          | Asthma                                        | 13.3 (7.0)                  | 940 (287)         | 7.0 (5.0)                  |

\* mean value ( $\pm$  SD) of all available in-hospital test samples for each case. DM = Diabetes

Mellitus; CAD = Coronary Artery Disease; COPD = Chronic Obstructive Pulmonary Disease;

HTN = Hypertension; Hx = History of; FEU = fibrinogen-equivalent-units; NA = not available.

Reference values for normal population: CRP ( $\leq$  0.8 mg/dL); Ferritin (11-336 ng/mL); D-dimer (0.2-0.5  $\mu$ g/mL FEU).

**Table S2. Antemortem plasma antibody and neutralization titers**

| Case No. | Day of Symptom | IgG    |        | IgM    |        | IgA    |        | Spike+ and RBD+ |     |     | Neutralization Titer |
|----------|----------------|--------|--------|--------|--------|--------|--------|-----------------|-----|-----|----------------------|
|          |                | Spike  | RBD    | Spike  | RBD    | Spike  | RBD    | IgG             | IgM | IgA |                      |
| 4        | 6              | 3.9445 | 3.9445 | 3.5184 | 3.168  | 1.5595 | 0.8945 | +               | +   | +   | 157                  |
| 8        | 7              | 1.462  | 0.33   | 2.87   | 0.623  | 0.2785 | 0.079  | +               | +   | -   | 2306                 |
| 8        | 11             | 3.772  | 3.5555 | 3.898  | 2.9985 | 1.146  | 0.61   | +               | +   | +   | 1927                 |
| 10       | 3              | 0.11   | 0.0815 | 0.025  | 0.094  | 0.069  | 0.034  | -               | -   | -   | <10                  |
| 13       | 11             | 3.947  | 3.944  | 3.122  | 3.69   | 3.601  | 3.9045 | +               | +   | +   | 368                  |
| 13       | 15             | 3.946  | 3.9475 | 1.8915 | 2.8155 | 2.878  | 3.634  | +               | +   | +   | 1926                 |
| 16       | 7              | 3.941  | 3.938  | 2.477  | 2.19   | 2.8    | 2.438  | +               | +   | +   | 2429                 |
| 17       | 6              | 3.929  | 3.9135 | 3.944  | 3.928  | 3.9415 | 3.2495 | +               | +   | +   | 318                  |
| 17       | 13             | 3.8655 | 3.892  | 3.6525 | 3.7165 | 3.843  | 3.282  | +               | +   | +   | 757                  |
| 17       | 17             | 3.929  | 3.91   | 3.846  | 3.9475 | 3.9035 | 3.639  | +               | +   | +   | 929                  |

**Table S3. Host genetic variation detected in RNASeq NGS libraries**

| Case No. | IFITM3    | IFITM3-promoter        | APOE          | DPP9                | OAS3                   | IFNAR2                 |
|----------|-----------|------------------------|---------------|---------------------|------------------------|------------------------|
| 1        | rs12252-T | rs34481144-G           | e3/e3         | no coverage         | rs10735079- <b>A</b>   | rs2236757- <b>G</b>    |
| 2        | rs12252-T | rs34481144-G           | no coverage   | no coverage         | rs10735079-G/ <b>A</b> | no coverage            |
| 3        | rs12252-T | rs34481144-G           | e2/ <b>e4</b> | rs2109069- <b>A</b> | no coverage            | rs2236757-G            |
| 4        | rs12252-T | rs34481144-G/ <b>A</b> | e3/ <b>e4</b> | rs2109069- <b>A</b> | no coverage            | no coverage            |
| 7        | rs12252-T | rs34481144-G           | e3/e3         | no coverage         | rs10735079- <b>A</b>   | no coverage            |
| 8        | rs12252-T | rs34481144-G           | e2/e3         | no coverage         | no coverage            | no coverage            |
| 9        | rs12252-T | rs34481144-G           | no coverage   | no coverage         | no coverage            | no coverage            |
| 10       | rs12252-T | rs34481144-G/ <b>A</b> | e3/e2         | rs2109069- <b>A</b> | no coverage            | rs2236757- <b>A</b> /G |
| 11       | rs12252-T | rs34481144-G           | e3/e3         | no coverage         | no coverage            | no coverage            |
| 12       | rs12252-T | rs34481144-G           | e3/e3         | no coverage         | no coverage            | no coverage            |
| 14       | rs12252-T | rs34481144-G           | e3/ <b>e4</b> | no coverage         | no coverage            | rs2236757-G            |
| 15       | rs12252-T | rs34481144-G           | e3/e3         | no coverage         | no coverage            | no coverage            |
| 16       | rs12252-T | rs34481144-G           | e3/ <b>e4</b> | rs2109069-G         | no coverage            | no coverage            |

Bold and highlighted bases/alleles are the ones related to severity or mortality of COVID-19 as reported (17-22).

**Table S4. Bacterial composition in samples**

| Case No.     | Total reads rooted to bacteria | Top1 bacterial genus   | Total reads rooted to top1 bacterial genus | Top2 bacterial genus   | Total reads rooted to top2 bacterial genus |
|--------------|--------------------------------|------------------------|--------------------------------------------|------------------------|--------------------------------------------|
| 1            | 2951399                        | <i>Rhodococcus</i>     | 2488244                                    | <i>Streptomyces</i>    | 45191                                      |
| 2            | 233837                         | <i>Streptococcus</i>   | 48925                                      | <i>Pseudomonas</i>     | 24260                                      |
| 3-sample 1*  | 1306975                        | <i>Pseudomonas</i>     | 359318                                     | <i>Acinetobacter</i>   | 336218                                     |
| 3-sample 2   | 578389                         | <i>Pseudomonas</i>     | 102892                                     | <i>Moraxella</i>       | 100608                                     |
| 4-sample 1   | 881820                         | <i>Acinetobacter</i>   | 584619                                     | <i>Moraxella</i>       | 21710                                      |
| 4-sample 2   | 2210747                        | <i>Acinetobacter</i>   | 1879641                                    | <i>Pseudomonas</i>     | 15487                                      |
| 7-sample 1   | 248750                         | <i>Rhodococcus</i>     | 45802                                      | <i>Pseudomonas</i>     | 26732                                      |
| 7-sample 2   | 2827268                        | <i>Rhodococcus</i>     | 2296860                                    | <i>Streptomyces</i>    | 69119                                      |
| 8-sample 1   | 118739                         | <i>Moraxella</i>       | 56305                                      | <i>Acinetobacter</i>   | 3309                                       |
| 8-sample 2   | 226634                         | <i>Moraxella</i>       | 96681                                      | <i>Acidovorax</i>      | 10956                                      |
| 9            | 350598                         | <i>Hydrogenophaga</i>  | 40509                                      | <i>Clostridium</i>     | 30988                                      |
| 10-sample 1  | 12854469                       | <i>Rhodococcus</i>     | 12283802                                   | <i>Moraxella</i>       | 85637                                      |
| 10-sample 2  | 12451423                       | <i>Rhodococcus</i>     | 12110056                                   | <i>Moraxella</i>       | 21092                                      |
| 11           | 489194                         | <i>Pseudomonas</i>     | 50534                                      | <i>Streptomyces</i>    | 35672                                      |
| 14-sample 1  | 86857                          | <i>Corynebacterium</i> | 7079                                       | <i>Cutibacterium</i>   | 6250                                       |
| 14-sample 2  | 81053                          | <i>Streptococcus</i>   | 11950                                      | <i>Cutibacterium</i>   | 8136                                       |
| 14-sample 3  | 85318                          | <i>Streptococcus</i>   | 9317                                       | <i>Corynebacterium</i> | 7595                                       |
| 15           | 6483919                        | <i>Rhodococcus</i>     | 5805119                                    | <i>Streptomyces</i>    | 56326                                      |
| 16- sample 1 | 550314                         | <i>Moraxella</i>       | 48485                                      | <i>Acinetobacter</i>   | 41697                                      |
| 16-sample 2  | 439016                         | <i>Streptomyces</i>    | 36788                                      | <i>Clostridium</i>     | 18167                                      |
| Normal lung1 | 4604887                        | <i>Rhodococcus</i>     | 4411434                                    | <i>Streptomyces</i>    | 14241                                      |
| Normal lung2 | 6208091                        | <i>Rhodococcus</i>     | 6065685                                    | <i>Streptomyces</i>    | 9140                                       |
| Normal lung3 | 5814789                        | <i>Rhodococcus</i>     | 5639832                                    | <i>Streptomyces</i>    | 11303                                      |

\*Cases with >1 FFPE lung sample were processed separately

**Table S5. Next Generation Sequencing Data**

|                   | Case No.  | RNA-seq library |                          | CoV2 enrichment library |                         | PV08472 coverage |
|-------------------|-----------|-----------------|--------------------------|-------------------------|-------------------------|------------------|
|                   |           | Total reads     | Reads mapped to PV08472* | Total reads             | Reads mapped to PV08472 |                  |
| Normal lung       | N1        | 160180855       | 0                        |                         | Not Done                | 0                |
|                   | N2        | 53166878        | 0                        |                         | Not Done                | 0                |
|                   | N3        | 108268615       | 0                        |                         | Not Done                | 0                |
|                   |           |                 |                          |                         |                         |                  |
| CoV2 lung samples | 1         | 130031409       | 145854                   |                         |                         | 1                |
|                   | 2         | 94185253        | 34243                    |                         |                         | 1                |
|                   | 3-1#      | 89063290        | 68                       |                         |                         |                  |
|                   | 3-2       | 70142554        | 3803                     | 124100696               | 110242118               | 1                |
|                   | 4-1       | 96466972        | 24                       | 53547639                | 5438374                 | 0.64             |
|                   | 4-2       | 52440604        | 2                        |                         |                         |                  |
|                   | 7         | 141542679       | 1497                     | 157066420               | 134322672               | 1                |
|                   | 8-1       | 42490916        | 15                       | 67876959                | 111414                  | 1                |
|                   | 8-2       | 99397041        | 0                        |                         |                         |                  |
|                   | 9         | 147083879       | 177                      | 146750080               | 99460475                | 1                |
|                   | 10-1      | 133092882       | 206                      |                         |                         |                  |
|                   | 10-2      | 65923966        | 1614                     | 126846127               | 109100024               | 1                |
|                   | 11        | 144019076       | 17                       | 72128177                | 19294905                | 0.63             |
|                   | 12        | 190608325       | 80                       | 73774946                | 47005076                | 0.98             |
|                   | 14-1      | 34689934        | 0                        | 71566988                | 216157                  | 0.32             |
|                   | 14-2      | 40896522        | 4                        |                         |                         |                  |
|                   | 14-3      | 51252557        | 0                        |                         |                         |                  |
|                   | 15        | 129194226       | 2                        | 75950337                | 402495                  | 0.23             |
| 16-1              | 150166853 | 0               | 53994537                 | 16981                   | 1                       |                  |
| 16-2              | 202940873 | 0               |                          |                         |                         |                  |

\* SARS-CoV-2/human/USA/NY-PV08472/2020 was reference sequence

#Cases with >1 FFPE lung sample were processed separately



**Table S6. Lineage typing of SARS-CoV-2 strains included in the phylogeny**  
Lineages were determined using Nextclade and Pangolin<sup>1</sup>

| Strain identifier                        | Nextclade lineage | Pangolin lineage | Main isolation countries                      |
|------------------------------------------|-------------------|------------------|-----------------------------------------------|
| hCoV-19/USA/NY-case 1/2020               | 20C               | B.1              | USA, UK, France                               |
| hCoV-19/USA/NY-case 2/2020               | 20C               | B.1              | USA, UK, France                               |
| hCoV-19/USA/CA-case 3/2020               | 20B               | B.1.1.167        | Denmark, Russia, Poland, Portugal, France, UK |
| hCoV-19/USA/CA-case 4/2020               | NA                | B.1              | USA, UK, France                               |
| hCoV-19/USA/NY-case 7/2020               | 20C               | B.1              | USA, UK, France                               |
| hCoV-19/USA/CA-case 8/2020               | 20C               | B.1              | USA, UK, France                               |
| hCoV-19/USA/NY-case 9/2020               | 20C               | B.1              | USA, UK, France                               |
| hCoV-19/USA/CA-case 10/2020              | 20B               | B.1.1.172        | USA                                           |
| hCoV-19/USA/NY-case 11/2020              | NA                | B.1              | USA, UK, France                               |
| hCoV-19/USA/NY-case 12/2020 <sup>3</sup> | NA                | B.1              | USA, UK, France                               |
| hCoV-19/USA/VT-case 14/2020              | NA                | Low coverage     | NA                                            |
| hCoV-19/USA/NY-case 15/2020              | NA                | Low coverage     | NA                                            |
| hCoV-19/USA/CA-case 16/2020              | 20C               | B.1              | USA, UK, France                               |

<sup>1</sup>Rambaut, A. *et al.* A dynamic nomenclature proposal for SARS-CoV-2 lineages to assist genomic epidemiology. *Nat Microbiol* **5**, 1403–1407 (2020).

**Table S7. Non-synonymous viral SNPs\***

| Case No. | Reference  | nt_position | ref_base | snp_base | coverage | snp_perc | ORF    | ORF_aa_position | ref_codon | ref_aa | snp_codon | snp_aa | CoV_GLUE_status |
|----------|------------|-------------|----------|----------|----------|----------|--------|-----------------|-----------|--------|-----------|--------|-----------------|
| 1        | NY_PV08472 | 1592        | T        | A        | 138      | 14.71%   | ORF1ab | 461             | ATC       | I      | AAC       | N      | Reported        |
| 1        | NY_PV08472 | 1601        | T        | A        | 138      | 15.79%   | ORF1ab | 464             | GTT       | V      | GAT       | D      | Reported        |
| 1        | NY_PV08472 | 5674        | A        | T        | 111      | 12.15%   | ORF1ab | 1822            | ACT       | T      | TCT       | S      | Not_reported    |
| 1        | NY_PV08472 | 5710        | G        | A        | 156      | 10.71%   | ORF1ab | 1834            | GGT       | G      | AGT       | S      | Not_reported    |
| 1        | NY_PV08472 | 11861       | C        | T        | 274      | 100%     | ORF1ab | 3884            | TCA       | S      | TTA       | L      | Reported        |
| 1        | NY_PV08472 | 18110       | A        | G        | 157      | 13.64%   | ORF1ab | 5967            | ATA       | I      | ATG       | M      | Not_reported    |
| 1        | NY_PV08472 | 18943       | C        | T        | 158      | 100%     | ORF1ab | 6245            | GCA       | A      | GTA       | V      | Reported        |
| 1        | NY_PV08472 | 19266       | A        | C        | 119      | 12.39%   | ORF1ab | 6353            | ACA       | T      | CCA       | P      | Not_reported    |
| 1        | NY_PV08472 | 20995       | T        | A        | 121      | 13.45%   | ORF1ab | 6929            | ATG       | M      | AAG       | K      | Reported        |
| 1        | NY_PV08472 | 24391       | C        | T        | 134      | 12.90%   | S      | 962             | CTT       | L      | TTT       | F      | Not_reported    |
| 1        | NY_PV08472 | 24466       | G        | C        | 102      | 10.10%   | S      | 987             | GTT       | V      | CTT       | L      | Not_reported    |
| 2        | NY_PV08472 | 4077        | T        | G        | 298      | 10.03%   | ORF1ab | 1289            | GAT       | D      | GAG       | E      | Not_reported    |
| 2        | NY_PV08472 | 4127        | C        | T        | 893      | 99.88%   | ORF1ab | 1306            | GCT       | A      | GTT       | V      | Reported        |
| 2        | NY_PV08472 | 7339        | A        | C        | 228      | 13.06%   | ORF1ab | 2377            | ATT       | I      | CTT       | L      | Not_reported    |
| 2        | NY_PV08472 | 8882        | C        | T        | 119      | 100%     | ORF1ab | 2891            | GCA       | A      | GTA       | V      | Reported        |
| 2        | NY_PV08472 | 11375       | A        | G        | 639      | 99.67%   | ORF1ab | 3722            | TAT       | Y      | TGT       | C      | Reported        |
| 2        | NY_PV08472 | 27268       | C        | G        | 134      | 100%     | ORF6   | 41              | TCT       | S      | TGT       | C      | Reported        |
| 7        | NY_PV08472 | 253         | C        | A        | 10608    | 22.61%   | ORF1ab | 15              | CAA       | Q      | AAA       | K      | Not_reported    |
| 7        | NY_PV08472 | 580         | C        | T        | 28028    | 21.95%   | ORF1ab | 124             | CGT       | R      | TGT       | C      | Not_reported    |
| 7        | NY_PV08472 | 836         | G        | A        | 163870   | 64.26%   | ORF1ab | 209             | GGT       | G      | GAT       | D      | Reported        |
| 7        | NY_PV08472 | 1582        | A        | T        | 44639    | 10.63%   | ORF1ab | 458             | AAA       | K      | TAA       | STOP   | Not_reported    |
| 7        | NY_PV08472 | 1936        | T        | A        | 7126     | 11.62%   | ORF1ab | 576             | TAT       | Y      | AAT       | N      | Not_reported    |
| 7        | NY_PV08472 | 2036        | C        | T        | 37277    | 33.21%   | ORF1ab | 609             | ACT       | T      | ATT       | I      | Reported        |
| 7        | NY_PV08472 | 4952        | C        | T        | 292246   | 22.55%   | ORF1ab | 1581            | ACG       | T      | ATG       | M      | Reported        |
| 7        | NY_PV08472 | 6517        | T        | C        | 19396    | 12.78%   | ORF1ab | 2103            | TCT       | S      | CCT       | P      | Not_reported    |

|   |            |       |   |   |         |        |        |      |     |   |     |      |              |
|---|------------|-------|---|---|---------|--------|--------|------|-----|---|-----|------|--------------|
| 7 | NY_PV08472 | 8836  | A | T | 209154  | 15.51% | ORF1ab | 2876 | ACA | T | TCA | S    | Not_reported |
| 7 | NY_PV08472 | 10415 | C | T | 89163   | 33.57% | ORF1ab | 3402 | TCA | S | TTA | L    | Reported     |
| 7 | NY_PV08472 | 11861 | C | T | 115213  | 99.98% | ORF1ab | 3884 | TCA | S | TTA | L    | Reported     |
| 7 | NY_PV08472 | 15889 | C | T | 30938   | 11.61% | ORF1ab | 5227 | TCA | S | TTA | L    | Reported     |
| 7 | NY_PV08472 | 16713 | C | T | 274712  | 22.41% | ORF1ab | 5502 | CGA | R | TGA | STOP | Not_reported |
| 7 | NY_PV08472 | 18456 | C | T | 317439  | 66.63% | ORF1ab | 6083 | CCT | P | TCT | S    | Not_reported |
| 7 | NY_PV08472 | 18943 | C | T | 305176  | 99.94% | ORF1ab | 6245 | GCA | A | GTA | V    | Reported     |
| 7 | NY_PV08472 | 18963 | C | T | 353890  | 24.93% | ORF1ab | 6252 | CCA | P | TCA | S    | Not_reported |
| 7 | NY_PV08472 | 21159 | C | T | 105078  | 15.93% | ORF1ab | 6984 | CAC | H | TAC | Y    | Not_reported |
| 7 | NY_PV08472 | 22763 | C | T | 66769   | 14.91% | S      | 419  | GCT | A | GTT | V    | Reported     |
| 7 | NY_PV08472 | 23222 | C | T | 119644  | 99.95% | S      | 572  | ACT | T | ATT | I    | Reported     |
| 7 | NY_PV08472 | 25114 | C | T | 70466   | 14.68% | S      | 1203 | CTT | L | TTT | F    | Not_reported |
| 7 | NY_PV08472 | 26682 | G | A | 554559  | 22.07% | M      | 72   | AGA | R | AAA | K    | Not_reported |
| 7 | NY_PV08472 | 27927 | C | T | 535835  | 17.80% | ORF8   | 30   | CCA | P | CTA | L    | Reported     |
| 7 | NY_PV08472 | 28903 | C | T | 148499  | 13.75% | N      | 229  | CAG | Q | TAG | STOP | Not_reported |
| 7 | NY_PV08472 | 29429 | C | T | 1116041 | 21.92% | N      | 404  | TCC | S | TTC | F    | Reported     |
| 9 | NY_PV08472 | 1301  | C | T | 421016  | 20.84% | ORF1ab | 364  | GCT | A | GTT | V    | Reported     |
| 9 | NY_PV08472 | 1666  | G | T | 40828   | 10.85% | ORF1ab | 486  | GCT | A | TCT | S    | Not_reported |
| 9 | NY_PV08472 | 2635  | A | T | 14171   | 16.55% | ORF1ab | 809  | ACA | T | TCA | S    | Not_reported |
| 9 | NY_PV08472 | 3971  | T | A | 27399   | 29.95% | ORF1ab | 1254 | TTA | L | TAA | STOP | Reported     |
| 9 | NY_PV08472 | 4201  | G | A | 17510   | 18.51% | ORF1ab | 1331 | GGT | G | AGT | S    | Not_reported |
| 9 | NY_PV08472 | 5177  | G | C | 5506    | 20.53% | ORF1ab | 1656 | TGG | W | TCG | S    | Reported     |
| 9 | NY_PV08472 | 7083  | T | A | 6667    | 97.44% | ORF1ab | 2291 | TGT | C | TGA | STOP | Not_reported |
| 9 | NY_PV08472 | 10724 | T | A | 298095  | 42.92% | ORF1ab | 3505 | CTA | L | CAA | Q    | Reported     |
| 9 | NY_PV08472 | 11911 | G | C | 3501    | 27.33% | ORF1ab | 3901 | GCT | A | CCT | P    | Not_reported |
| 9 | NY_PV08472 | 12086 | C | T | 157015  | 54.21% | ORF1ab | 3959 | ACT | T | ATT | I    | Reported     |
| 9 | NY_PV08472 | 12440 | A | C | 7382    | 48.87% | ORF1ab | 4077 | TAT | Y | TCT | S    | Reported     |
| 9 | NY_PV08472 | 12441 | T | A | 7076    | 46.21% | ORF1ab | 4077 | TAT | Y | TAA | STOP | Not_reported |

|    |            |       |   |   |         |        |        |      |     |   |     |      |              |
|----|------------|-------|---|---|---------|--------|--------|------|-----|---|-----|------|--------------|
| 9  | NY_PV08472 | 12576 | A | C | 3251    | 50.08% | ORF1ab | 4122 | TTA | L | TTC | F    | Not_reported |
| 9  | NY_PV08472 | 14253 | T | C | 95012   | 36.21% | ORF1ab | 4682 | TGG | W | CGG | R    | Not_reported |
| 9  | NY_PV08472 | 15216 | A | G | 379527  | 73.74% | ORF1ab | 5003 | AAC | N | GAC | D    | Not_reported |
| 9  | NY_PV08472 | 15224 | C | A | 459     | 19.13% | ORF1ab | 5005 | CAC | H | CAA | Q    | Not_reported |
| 9  | NY_PV08472 | 16360 | T | G | 6577    | 99.79% | ORF1ab | 5384 | GTG | V | GGG | G    | Reported     |
| 9  | NY_PV08472 | 17355 | C | T | 2291664 | 11.90% | ORF1ab | 5716 | CGT | R | TGT | C    | Not_reported |
| 9  | NY_PV08472 | 17746 | C | T | 542671  | 84.79% | ORF1ab | 5846 | GCC | A | GTC | V    | Reported     |
| 9  | NY_PV08472 | 18046 | C | T | 225235  | 21.08% | ORF1ab | 5946 | ACA | T | ATA | I    | Reported     |
| 9  | NY_PV08472 | 18402 | C | T | 443249  | 99.92% | ORF1ab | 6065 | CCA | P | TCA | S    | Not_reported |
| 9  | NY_PV08472 | 18471 | C | T | 51758   | 40.28% | ORF1ab | 6088 | CGT | R | TGT | C    | Not_reported |
| 9  | NY_PV08472 | 18594 | G | T | 208714  | 32.65% | ORF1ab | 6129 | GAG | E | TAG | STOP | Not_reported |
| 9  | NY_PV08472 | 19764 | C | T | 289390  | 10.16% | ORF1ab | 6519 | CCA | P | TCA | S    | Not_reported |
| 9  | NY_PV08472 | 20746 | C | T | 8748    | 33.67% | ORF1ab | 6846 | ACT | T | ATT | I    | Reported     |
| 9  | NY_PV08472 | 22618 | T | C | 11093   | 54.92% | S      | 371  | TCC | S | CCC | P    | Not_reported |
| 9  | NY_PV08472 | 23123 | T | A | 66994   | 99.84% | S      | 539  | GTC | V | GAC | D    | Not_reported |
| 9  | NY_PV08472 | 25237 | C | T | 204451  | 89.49% | S      | 1244 | CTC | L | TTC | F    | Not_reported |
| 9  | NY_PV08472 | 25987 | C | A | 132     | 87.10% | ORF3a  | 217  | ACT | T | AAT | N    | Reported     |
| 9  | NY_PV08472 | 27592 | A | G | 60634   | 97.42% | ORF7a  | 85   | AAA | K | AGA | R    | Reported     |
| 11 | NY_PV08472 | 568   | A | G | 3419    | 100%   | ORF1ab | 120  | AAG | K | GAG | E    | Not_reported |
| 11 | NY_PV08472 | 4643  | C | G | 1727    | 100%   | ORF1ab | 1478 | TCT | S | TGT | C    | Reported     |
| 11 | NY_PV08472 | 14253 | T | C | 10141   | 57.75% | ORF1ab | 4682 | TGG | W | CGG | R    | Not_reported |
| 11 | NY_PV08472 | 20010 | A | G | 7957967 | 40%    | ORF1ab | 6601 | AAA | K | GAA | E    | Not_reported |
| 11 | NY_PV08472 | 22384 | C | T | 2481    | 26.90% | S      | 293  | CTT | L | TTT | F    | Not_reported |
| 11 | NY_PV08472 | 24357 | T | A | 1414    | 100%   | S      | 950  | GAT | D | GAA | E    | Not_reported |
| 11 | NY_PV08472 | 24941 | T | C | 999     | 100%   | S      | 1145 | TTA | L | TCA | S    | Reported     |
| 11 | NY_PV08472 | 28393 | C | A | 211     | 66.96% | N      | 59   | CAT | H | AAT | N    | Not_reported |
| 12 | NY_PV08472 | 1407  | G | C | 1284    | 67.81% | ORF1ab | 399  | AAG | K | AAC | N    | Not_reported |
| 12 | NY_PV08472 | 2752  | A | T | 556     | 40.64% | ORF1ab | 848  | AGG | R | TGG | W    | Not_reported |

|    |            |       |   |   |        |        |        |      |     |   |     |   |              |
|----|------------|-------|---|---|--------|--------|--------|------|-----|---|-----|---|--------------|
| 12 | NY_PV08472 | 2944  | G | A | 24648  | 31.39% | ORF1ab | 912  | GGT | G | AGT | S | Not_reported |
| 12 | NY_PV08472 | 3386  | A | G | 16776  | 57.09% | ORF1ab | 1059 | AAT | N | AGT | S | Reported     |
| 12 | NY_PV08472 | 4843  | C | A | 183    | 10.24% | ORF1ab | 1545 | CAC | H | AAC | N | Not_reported |
| 12 | NY_PV08472 | 5188  | C | A | 1774   | 21.72% | ORF1ab | 1660 | CAA | Q | AAA | K | Not_reported |
| 12 | NY_PV08472 | 7421  | G | C | 381557 | 26.08% | ORF1ab | 2404 | TGT | C | TCT | S | Reported     |
| 12 | NY_PV08472 | 8348  | G | C | 2718   | 40.86% | ORF1ab | 2713 | TGG | W | TCG | S | Reported     |
| 12 | NY_PV08472 | 10078 | C | A | 172752 | 36.65% | ORF1ab | 3290 | CTT | L | ATT | I | Not_reported |
| 12 | NY_PV08472 | 11092 | T | C | 12432  | 59.58% | ORF1ab | 3628 | TTT | F | CTT | L | Not_reported |
| 12 | NY_PV08472 | 11093 | T | A | 12426  | 64.04% | ORF1ab | 3628 | TTT | F | TAT | Y | Reported     |
| 12 | NY_PV08472 | 11323 | G | T | 52419  | 39.72% | ORF1ab | 3705 | GCT | A | TCT | S | Not_reported |
| 12 | NY_PV08472 | 11324 | C | T | 55538  | 50.15% | ORF1ab | 3705 | GCT | A | GTT | V | Reported     |
| 12 | NY_PV08472 | 12473 | C | T | 566    | 42.28% | ORF1ab | 4088 | ACA | T | ATA | I | Reported     |
| 12 | NY_PV08472 | 12583 | C | T | 9372   | 83.42% | ORF1ab | 4125 | CCT | P | TCT | S | Not_reported |
| 12 | NY_PV08472 | 12703 | G | A | 108    | 20.69% | ORF1ab | 4165 | GAT | D | AAT | N | Not_reported |
| 12 | NY_PV08472 | 14112 | C | T | 57116  | 11.99% | ORF1ab | 4635 | CCT | P | TCT | S | Not_reported |
| 12 | NY_PV08472 | 15157 | C | T | 16469  | 99.09% | ORF1ab | 4983 | ACA | T | ATA | I | Reported     |
| 12 | NY_PV08472 | 15298 | T | C | 15038  | 95.97% | ORF1ab | 5030 | CTT | L | CCT | P | Reported     |
| 12 | NY_PV08472 | 15304 | G | T | 13180  | 95.66% | ORF1ab | 5032 | CGC | R | CTC | L | Reported     |
| 12 | NY_PV08472 | 17364 | C | T | 193913 | 16.87% | ORF1ab | 5719 | CAC | H | TAC | Y | Not_reported |
| 12 | NY_PV08472 | 18402 | C | T | 76128  | 99.37% | ORF1ab | 6065 | CCA | P | TCA | S | Not_reported |
| 12 | NY_PV08472 | 18812 | G | A | 28299  | 20.56% | ORF1ab | 6201 | ATG | M | ATA | I | Not_reported |
| 12 | NY_PV08472 | 18861 | A | G | 46254  | 34.01% | ORF1ab | 6218 | ACT | T | GCT | A | Not_reported |
| 12 | NY_PV08472 | 18943 | C | T | 50206  | 20.06% | ORF1ab | 6245 | GCA | A | GTA | V | Reported     |
| 12 | NY_PV08472 | 20613 | G | T | 4821   | 29.28% | ORF1ab | 6802 | GCG | A | TCG | S | Not_reported |
| 12 | NY_PV08472 | 20764 | T | C | 4221   | 90.21% | ORF1ab | 6852 | TTA | L | TCA | S | Reported     |
| 12 | NY_PV08472 | 25974 | C | A | 61708  | 26.88% | ORF3a  | 213  | CAG | Q | AAG | K | Not_reported |
| 12 | NY_PV08472 | 26139 | A | T | 10773  | 17.62% | ORF3a  | 268  | ACG | T | TCG | S | Not_reported |
| 12 | NY_PV08472 | 26143 | C | T | 11273  | 16.20% | ORF3a  | 269  | ACG | T | ATG | M | Reported     |

|    |            |       |   |   |        |        |        |      |     |   |     |      |              |
|----|------------|-------|---|---|--------|--------|--------|------|-----|---|-----|------|--------------|
| 15 | NY_PV08472 | 22618 | T | C | 10797  | 99.98% | S      | 371  | TCC | S | CCC | P    | Not_reported |
| 10 | NY_PV08472 | 721   | C | T | 45101  | 20.13% | ORF1ab | 171  | CGT | R | TGT | C    | Not_reported |
| 10 | NY_PV08472 | 970   | C | T | 174667 | 21.35% | ORF1ab | 254  | CCT | P | TCT | S    | Not_reported |
| 10 | NY_PV08472 | 1004  | T | C | 176959 | 99.94% | ORF1ab | 265  | ATC | I | ACC | T    | Reported     |
| 10 | NY_PV08472 | 4649  | C | T | 204226 | 11.34% | ORF1ab | 1480 | CCT | P | CTT | L    | Reported     |
| 10 | NY_PV08472 | 6484  | C | T | 84063  | 10.50% | ORF1ab | 2092 | CAC | H | TAC | Y    | Not_reported |
| 10 | NY_PV08472 | 6685  | C | T | 82363  | 11.64% | ORF1ab | 2159 | CGG | R | TGG | W    | Not_reported |
| 10 | NY_PV08472 | 6927  | C | A | 226025 | 10.03% | ORF1ab | 2239 | TGC | C | TGA | STOP | Not_reported |
| 10 | NY_PV08472 | 8414  | A | G | 128981 | 15.79% | ORF1ab | 2735 | AAG | K | AGG | R    | Reported     |
| 10 | NY_PV08472 | 8747  | C | T | 608481 | 29.59% | ORF1ab | 2846 | ACT | T | ATT | I    | Reported     |
| 10 | NY_PV08472 | 9059  | C | T | 47346  | 11.54% | ORF1ab | 2950 | CCT | P | CTT | L    | Reported     |
| 10 | NY_PV08472 | 9155  | A | G | 73617  | 31.11% | ORF1ab | 2982 | GAG | E | GGG | G    | Reported     |
| 10 | NY_PV08472 | 10704 | G | A | 509476 | 10.95% | ORF1ab | 3498 | ATG | M | ATA | I    | Not_reported |
| 10 | NY_PV08472 | 19287 | G | T | 87207  | 14.91% | ORF1ab | 6360 | GCT | A | TCT | S    | Not_reported |
| 10 | NY_PV08472 | 19320 | T | C | 104684 | 15.79% | ORF1ab | 6371 | TAT | Y | CAT | H    | Not_reported |
| 10 | NY_PV08472 | 20764 | T | C | 181115 | 10.79% | ORF1ab | 6852 | TTA | L | TCA | S    | Reported     |
| 10 | NY_PV08472 | 21354 | C | T | 416302 | 21.44% | ORF1ab | 7049 | CCC | P | TCC | S    | Not_reported |
| 10 | NY_PV08472 | 23933 | C | T | 361977 | 13.34% | S      | 809  | CCA | P | CTA | L    | Reported     |
| 10 | NY_PV08472 | 24158 | C | T | 84836  | 11.68% | S      | 884  | TCT | S | TTT | F    | Reported     |
| 10 | NY_PV08472 | 24580 | G | T | 217567 | 10.78% | S      | 1025 | GCT | A | TCT | S    | Not_reported |
| 10 | NY_PV08472 | 25508 | T | G | 256610 | 99.82% | ORF3a  | 57   | CAT | H | CAG | Q    | Not_reported |
| 10 | NY_PV08472 | 27977 | A | T | 286397 | 99.95% | ORF8   | 47   | ATT | I | TTT | F    | Not_reported |
| 10 | NY_PV08472 | 28826 | G | A | 95068  | 99.96% | N      | 203  | AGG | R | AAG | K    | Reported     |
| 10 | NY_PV08472 | 28828 | G | C | 95044  | 99.93% | N      | 204  | GGA | G | CGA | R    | Not_reported |
| 3  | NY_PV08472 | 1004  | T | C | 95007  | 99.98% | ORF1ab | 265  | ATC | I | ACC | T    | Reported     |
| 3  | NY_PV08472 | 3598  | C | T | 116576 | 58.32% | ORF1ab | 1130 | CTT | L | TTT | F    | Not_reported |
| 3  | NY_PV08472 | 9109  | A | G | 40404  | 11.51% | ORF1ab | 2967 | ACC | T | GCC | A    | Not_reported |
| 3  | NY_PV08472 | 9191  | C | T | 60273  | 34.38% | ORF1ab | 2994 | GCT | A | GTT | V    | Reported     |

|   |            |       |   |   |        |        |        |      |     |   |     |      |              |
|---|------------|-------|---|---|--------|--------|--------|------|-----|---|-----|------|--------------|
| 3 | NY_PV08472 | 13629 | C | T | 127062 | 12.19% | ORF1ab | 4474 | CAT | H | TAT | Y    | Not_reported |
| 3 | NY_PV08472 | 24782 | A | C | 249984 | 98.96% | S      | 1092 | GAA | E | GCA | A    | Reported     |
| 3 | NY_PV08472 | 25508 | T | G | 132536 | 99.84% | ORF3a  | 57   | CAT | H | CAG | Q    | Not_reported |
| 3 | NY_PV08472 | 26044 | T | C | 42433  | 99.96% | ORF3a  | 236  | ATT | I | ACT | T    | Reported     |
| 3 | NY_PV08472 | 28826 | G | A | 81877  | 99.92% | N      | 203  | AGG | R | AAG | K    | Reported     |
| 3 | NY_PV08472 | 28828 | G | C | 81870  | 99.95% | N      | 204  | GGA | G | CGA | R    | Not_reported |
| 4 | NY_PV08472 | 1004  | T | C | 1690   | 100%   | ORF1ab | 265  | ATC | I | ACC | T    | Reported     |
| 4 | NY_PV08472 | 14253 | T | A | 2123   | 78.20% | ORF1ab | 4682 | TGG | W | AGG | R    | Not_reported |
| 4 | NY_PV08472 | 22094 | A | G | 21577  | 33.47% | S      | 196  | AAT | N | AGT | S    | Reported     |
| 4 | NY_PV08472 | 22321 | C | T | 7059   | 97.27% | S      | 272  | CCT | P | TCT | S    | Not_reported |
| 4 | NY_PV08472 | 23389 | C | T | 124581 | 97.78% | S      | 628  | CAA | Q | TAA | STOP | Not_reported |
| 4 | NY_PV08472 | 23737 | G | T | 10761  | 10.49% | S      | 744  | GGT | G | TGT | C    | Not_reported |

\*SNP call criteria: site coverage > 100 reads; Q value >25; variant base > 10%; variant base pass strand filter; SNP call p-value < 0.01

**Table S8. Summary of detected SNPs in all the samples**

| Sample | ORF1ab | S | ORF3a | E | M | ORF6 | ORF7a | ORF8 | N | NotInCDS | Syn | Total |
|--------|--------|---|-------|---|---|------|-------|------|---|----------|-----|-------|
| 1      | 9      | 2 |       |   |   |      |       |      |   | 1        | 2   | 14    |
| 2      | 5      |   |       |   |   | 1    |       |      |   |          | 1   | 7     |
| 3      | 5      | 1 | 2     |   |   |      |       |      | 2 |          | 7   | 17    |
| 4      | 2      | 4 |       |   |   |      |       |      |   |          | 6   | 12    |
| 7      | 17     | 3 |       |   | 1 |      |       | 1    | 2 | 1        | 11  | 36    |
| 8      |        |   |       |   |   |      |       |      |   |          |     | 0     |
| 9      | 25     | 3 | 1     |   |   |      | 1     |      |   |          | 15  | 45    |
| 10     | 16     | 3 | 1     |   |   |      |       | 1    | 2 |          | 10  | 33    |
| 11     | 4      | 3 |       |   |   |      |       |      | 1 | 1        | 2   | 11    |
| 12     | 27     |   | 3     |   |   |      |       |      |   |          | 15  | 45    |
| 14     |        |   |       |   |   |      |       |      |   |          | 2   | 2     |
| 15     |        | 1 |       |   |   |      |       |      |   |          |     | 1     |
| 16     |        |   |       |   |   |      |       |      |   |          |     | 0     |

**Table S9. Shared SNPs/SNP positions among samples**

| Ref. nucleotide position | Ref. nt | SNP_ nt | ORF    | ORF AA position | Ref. codon | Ref. AA | SNP Codon    | SNP AA | Samples               |
|--------------------------|---------|---------|--------|-----------------|------------|---------|--------------|--------|-----------------------|
| 1004                     | T       | C       | ORF1ab | 265             | ATC        | I       | ACC          | T      | 3, 4, 10              |
| 11861                    | C       | T       | ORF1ab | 3884            | TCA        | S       | TTA          | L      | 1, 7                  |
| 14252                    | T       | C       | ORF1ab | 4681            | TAT        | Y       | TAC          | Y      | 3, 7, 9, 12           |
| 14253                    | T       | C,A     | ORF1ab | 4682            | TGG        | W       | CGG,,A<br>GG | R      | 4, 9, 11              |
| 14261                    | G       | A       | ORF1ab | 4684            | CAG        | Q       | CAA          | Q      | 9, 12                 |
| 16814                    | C       | T       | ORF1ab | 5535            | TAC        | Y       | TAT          | Y      | 9, 12                 |
| 18402                    | C       | T       | ORF1ab | 6065            | CCA        | P       | TCA          | S      | 9, 12                 |
| 18943                    | C       | T       | ORF1ab | 6245            | GCA        | A       | GTA          | V      | 2, 7, 12              |
| 20764                    | T       | C       | ORF1ab | 6852            | TTA        | L       | TCA          | S      | 10, 12                |
| 22618                    | T       | C       | S      | 371             | TCC        | S       | CCC          | P      | 9, 15                 |
| 24465                    | G       | A       | S      | 986             | AAG        | K       | AAA          | K      | 1, 3, 7, 9,<br>10, 12 |
| 25508                    | T       | G       | ORF3a  | 57              | CAT        | H       | CAG          | Q      | 3, 10                 |
| 28826                    | G       | A       | N      | 203             | AGG        | R       | AAA          | K      | 3, 10                 |



|       |   |   |              |     |     |   |     |   |       |
|-------|---|---|--------------|-----|-----|---|-----|---|-------|
| 28827 | G | A | N            | 203 | AGG | R | AAA | K | 3, 10 |
| 28828 | G | C | N            | 204 | GGA | G | CGA | R | 3, 10 |
| 29485 | G | A | NotInC<br>DS |     |     |   |     |   | 1, 7  |

**Table S10. D614G mutation survey**

| Sample | 23348 position coverage | Number of As |
|--------|-------------------------|--------------|
| 1      | 876                     | 0            |
| 2      | 169                     | 0            |
| 3-1    |                         |              |
| 3-2    | 535014                  | 40           |
| 4-1    | 70187                   | 1            |
| 4-2    |                         |              |
| 8-1    | 77                      | 0            |
| 8-2    |                         |              |
| 9      | 191674                  | 12           |
| 10-1   |                         |              |
| 10-2   | 464520                  | 37           |
| 11     | 3199                    | 0            |
| 12-1   | 422978                  | 28           |
| 12-2   | 16435                   | 1            |
| 14-1   | 1                       | 0            |
| 15     | 0                       |              |
| 16-1   | 59                      | 0            |
| 16-2   |                         |              |

S protein amino acid 614 position in Wuhan strain (MN975262\_01/2020\_China) is at 23403 and is A (GAT D) and it is G (GGT G in frame 1) at 23348 in NY strain (NY\_PV08472, reference in this study).

**Table S11. Histopathological grading of DAD stages in COVID-19 cases**

| Case No. | Time of Symptom Onset to Death, SOTD (days) | Acute DAD* | Organizing DAD* | Fibrotic DAD* |
|----------|---------------------------------------------|------------|-----------------|---------------|
| 1        | 3                                           | 3.0 (0.0)  | 1.1 (0.4)       | 0.0 (0.0)     |
| 2        | 7                                           | 2.9 (0.4)  | 1.6 (0.5)       | 0.0 (0.0)     |
| 3        | 7                                           | 1.1 (0.4)  | 2.3 (0.7)       | 2.6 (0.5)     |
| 4        | 7                                           | 1.9 (0.4)  | 2.9 (0.4)       | 1.9 (0.6)     |
| 5        | 7                                           | 1.1 (0.4)  | 2.9 (0.4)       | 1.6 (0.5)     |
| 6        | 8                                           | 2.6 (0.5)  | 2.6 (0.5)       | 0.0 (0.0)     |
| 7        | 9                                           | 2.9 (0.4)  | 2.6 (0.5)       | 0.0 (0.0)     |
| 8        | 11                                          | 0.1 (0.4)  | 2.3 (0.9)       | 0.5 (0.8)     |
| 9†       | 13                                          | 3.0 (0.0)  | 0.0 (0.0)       | 0.0 (0.0)     |
| 10       | 14                                          | 1.5 (0.5)  | 2.8 (0.5)       | 1.8 (0.5)     |
| 11       | 16                                          | 3.0 (0.0)  | 1.6 (0.5)       | 0.1 (0.4)     |
| 12       | 17                                          | 2.6 (0.5)  | 2.3 (0.7)       | 0.5 (0.5)     |
| 13       | 19                                          | 0.0 (0.0)  | 1.4 (0.5)       | 3.0 (0.0)     |
| 14       | 20                                          | 0.4 (0.5)  | 3.0 (0.0)       | 0.3 (0.5)     |
| 15       | 25                                          | 2.9 (0.4)  | 0.4 (0.5)       | 0.0 (0.0)     |
| 16       | 40                                          | 0.9 (0.4)  | 3.0 (0.0)       | 2.6 (0.5)     |
| 17       | 40                                          | 0.0 (0.0)  | 1.8 (0.5)       | 3.0 (0.0)     |
| 18       | 47                                          | 0.0 (0.0)  | 1.0 (0.0)       | 3.0 (0.0)     |

\* Average histopathological score ( $\pm$  SD) for the specified DAD stage evaluated for each COVID-19 case (see Supplementary Methods).

† Widespread tissue necrosis and edema with large a pulmonary clot observed in this patient lung.

**Table S12. List of primary antibodies for immunohistochemistry and immunofluorescence analyses.**

| Primary Antibodies         | Company           | Species | Type       | Reference#          |
|----------------------------|-------------------|---------|------------|---------------------|
| Alpha-SMA                  | Abcam             | Mouse   | Monoclonal | ab7817              |
| CD14                       | Abcam             | Rabbit  | Monoclonal | ab183322            |
| CD15                       | Biocare Medical   | Mouse   | Monoclonal | CM073               |
| CD163                      | Abcam             | Rabbit  | Monoclonal | ab182422            |
| CD20                       | Abcam             | Rabbit  | Monoclonal | ab78237             |
| CD3                        | Abcam             | Rabbit  | Monoclonal | ab16669             |
| CD31                       | Santa Cruz        | Rabbit  | Polyclonal | sc1506-R            |
| CD42b                      | Abcam             | Rabbit  | Monoclonal | ab183345            |
| CD61                       | Vector Labs       | Mouse   | Monoclonal | VP-C362             |
| Claudin-5                  | ThermoFisher      | Mouse   | Monoclonal | 35-2500             |
| Claudin-5                  | Abcam             | Rabbit  | Monoclonal | ab131259            |
| Cleaved caspase 3          | Cell Signaling    | Rabbit  | Polyclonal | 9661                |
| Collagen Type I            | Abcam             | Rabbit  | Polyclonal | ab34710             |
| Collagen Type IV           | Abcam             | Rabbit  | Polyclonal | ab6586              |
| pan-Cytokeratin            | Abcam             | Mouse   | Monoclonal | ab27988             |
| E-cadherin                 | Abcam             | Mouse   | Monoclonal | ab219332            |
| ERG                        | Biocare Medical   | Mouse   | Monoclonal | CM421               |
| Fibrin                     | EMD Millipore     | Mouse   | Monoclonal | MABS2155            |
| Histone H3, citrullinated  | Abcam             | Rabbit  | Polyclonal | ab5103              |
| IL-6                       | Abcam             | Mouse   | Monoclonal | ab9324              |
| Ki67                       | Abcam             | Rabbit  | Monoclonal | ab16667             |
| Ki67                       | Cell Signaling    | Mouse   | Monoclonal | 9449                |
| MPO                        | Abcam             | Rabbit  | Polyclonal | ab9535              |
| MPO                        | Novus Biologicals | Mouse   | Monoclonal | MAB3174             |
| Neutrophil elastase        | Abcam             | Rabbit  | Polyclonal | ab68672             |
| p21                        | Proteintech       | Rabbit  | Polyclonal | 10355-1-AP          |
| PAI-1                      | ThermoFisher      | Mouse   | Monoclonal | MA5-17171           |
| Pro-SPC                    | EMD Millipore     | Rabbit  | Polyclonal | AB3786              |
| SARS-CoV-2 NP              | Sino Biological   | Mouse   | Monoclonal | 40143-MM05          |
| TGFβ1                      | ThermoFisher      | Mouse   | Monoclonal | MA5-16949           |
| Tissue Factor              | ThermoFisher      | Mouse   | Monoclonal | MA1-83495           |
| VWF                        | Abcam             | Rabbit  | Polyclonal | ab9378              |
| γH2AX                      | ThermoFisher      | Rabbit  | Polyclonal | A300-081A           |
| Mouse IgG isotype controls | ThermoFisher      | -       | -          | 02-6502, 14-4714-82 |
| Rabbit IgG isotype control | ThermoFisher      | -       | -          | 02-6102             |
